# Supplementary material for: LC-MS Profile, Gastrointestinal and Gut Microbiota Stability and Antioxidant Activity of Rhodiola rosea Herb Metabolites: A Comparative Study with Subterranean Organs
Source: PubMed Central journal article supplement (PMC7346138; doi:10.3390/antiox9060526), 2020-06-16
Supplement: antioxidants-09-00526-s001.pdf [file antioxidants-09-00526-s001.pdf]

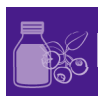

Supplementary materials

# LC-MS Profile, Gastrointestinal and Gut Microbiota Stability and Antioxidant Activity of *Rhodiola rosea* Herb Metabolites: A Comparative Study with Subterranean Organs

Daniil N. Olennikov <sup>1,\*</sup>, Nadezhda K. Chirikova <sup>2</sup>, Aina G. Vasil'eva<sup>2</sup>, and Innokentii A. Fedorov <sup>3</sup>

<sup>1</sup> Laboratory of Medical and Biological Research, Institute of General and Experimental Biology, Siberian Division, Russian Academy of Science, 6 Sakh'yarovoy Street, Ulan-Ude 670047, Russia

<sup>2</sup> Department of Biology, Institute of Natural Sciences, North-Eastern Federal University, 58 Belinsky Street, Yakutsk 677027, Russia; hofnung@mail.ru (N.K.C.); kagamisatou@gmail.com (A.G.V.)

<sup>3</sup> Institute for Biological Problems of Cryolithozone, Siberian Division, Russian Academy of Science, 41 Lenina Street, Yakutsk, 677000, Russia; fedorovia1958@mail.ru

\* Correspondence: olennikovdn@mail.ru; Tel.: +7-9021-600-627 (D.N.O.)

## Content

**Figure S1.** High-Performance Liquid Chromatography with Diode Array Detection (HPLC-DAD) chromatograms of C<sub>18</sub> Sep-Pak ethyl acetate-methanol eluates of *Rhodiola rosea* organ extracts.

**Figure S2.** HPLC-DAD chromatograms of polyamide eluates I of *R. rosea* organ extracts.

**Figure S3.** High-Performance Liquid Chromatography with Electrospray Ionization Triple Quadrupole Mass Spectrometric Detection (HPLC-ESI-QQQ-MS) chromatograms of polyamide eluates II of *R. rosea* organ extracts.

**Figure S4.** HPLC-ESI-QQQ-MS chromatograms of polyamide eluates III of *R. rosea* organ extracts.

**Figure S5.** HPLC-DAD chromatograms of hydrolysates of total extracts of *R. rosea* organ extracts.

**Table S1.** Reference standards used for the qualitative and quantitative analysis by HPLC-DAD-ESI-QQQ-MS and HPLC-DAD assays.

**Table S2.** Regression equations, correlation coefficients, standard deviation, limits of detection, limits of quantification and linear ranges for 44 reference standards used in HPLC-MS quantification.

**Table S3.** Regression equations, correlation coefficients, standard deviation, limits of detection, limits of quantification and linear ranges for 13 reference standards used in HPLC-DAD quantification.

**Table S4.** Retention times, UV- and ESI-MS spectral data of compounds 1–146 found in *Rhodiola rosea*.

**Table S5.** UV-spectral patterns of compounds found in *R. rosea*.

**Table S6.** Selected spectra of compounds found in *R. rosea*.

**Table S7.** Known flavonol glycosides of *R. rosea*.

**Table S8.** Quantitative content of compounds 1–146 in *R. rosea* organs.

**Table S9.** Content of selected compounds in three *R. rosea* extracts.

**Table S10.** Content of selected compounds of *R. rosea* rhizome extract (whole probe) before and after *in vitro* treatment by the simulated gastric and intestinal media.

**Table S11.** Content of selected compounds of *R. rosea* leaves extract (whole probe) before and after *in vitro* treatment by the simulated gastric and intestinal media.

**Table S12.** Content of selected compounds of *R. rosea* flowers extract (whole probe) before and after *in vitro* treatment by the simulated gastric and intestinal media.

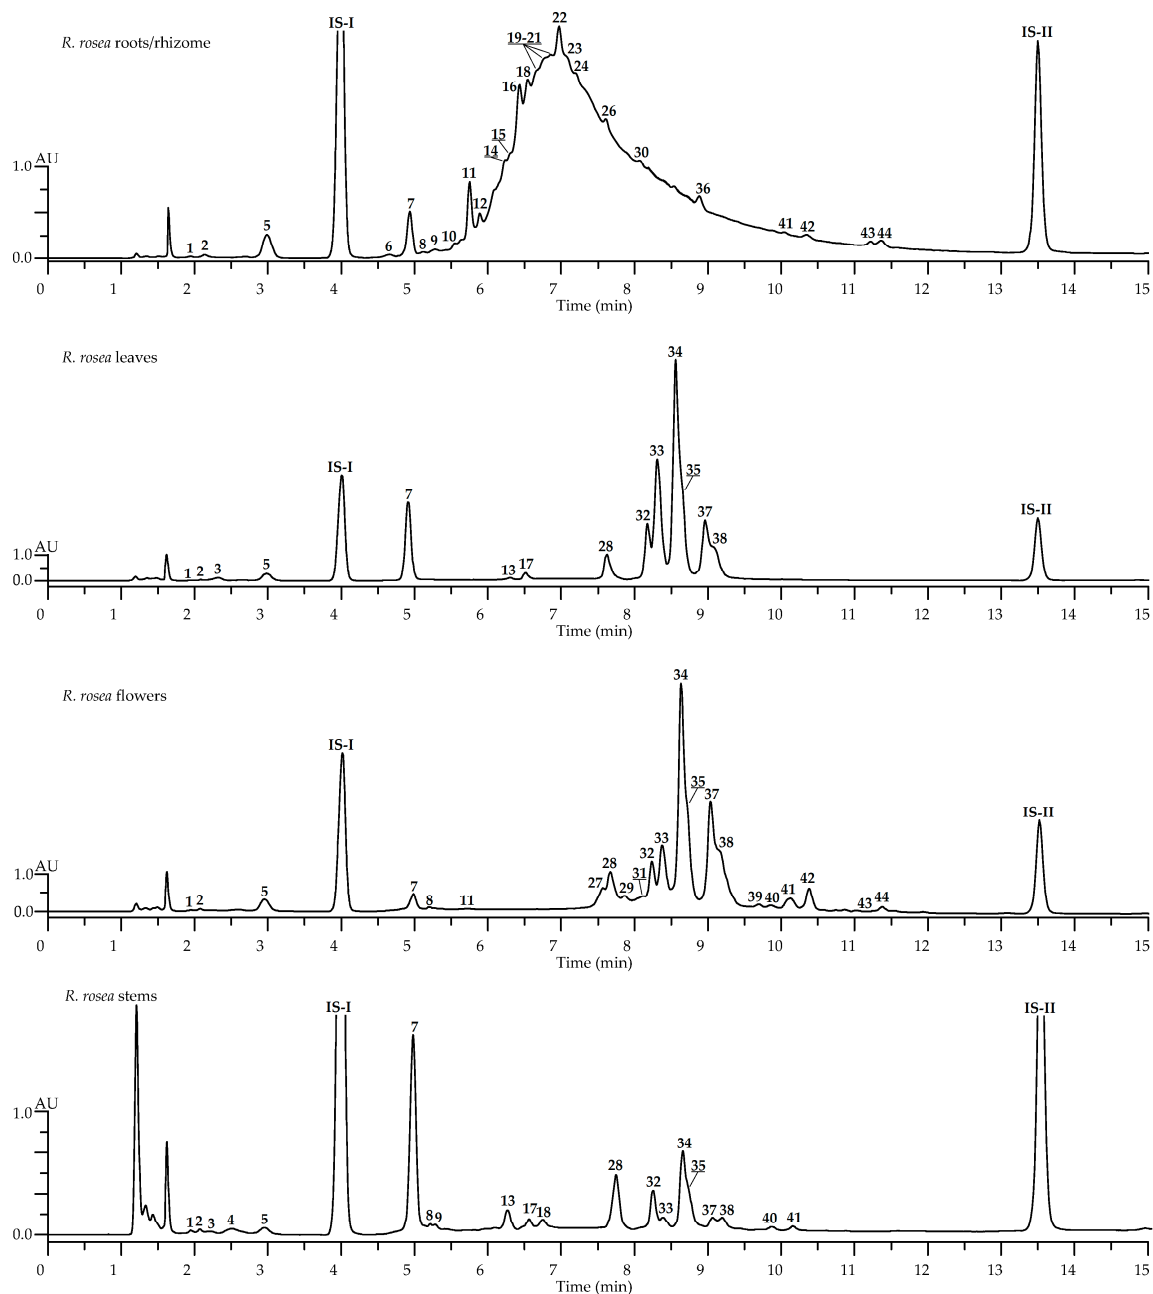

**Figure S1.** High-Performance Liquid Chromatography with Diode Array Detection (HPLC-DAD) chromatograms (UV detector  $\lambda$  210 nm) of  $C_{18}$  Sep-Pak ethyl acetate-methanol eluates of *Rhodiola rosea* organ extracts. Compounds are numbered as listed in Table 4. IS-I—internal standard I (caffeine, 500  $\mu\text{g/mL}$ ); IS-II—internal standard II (benzoic acid, 250  $\mu\text{g/mL}$ ).

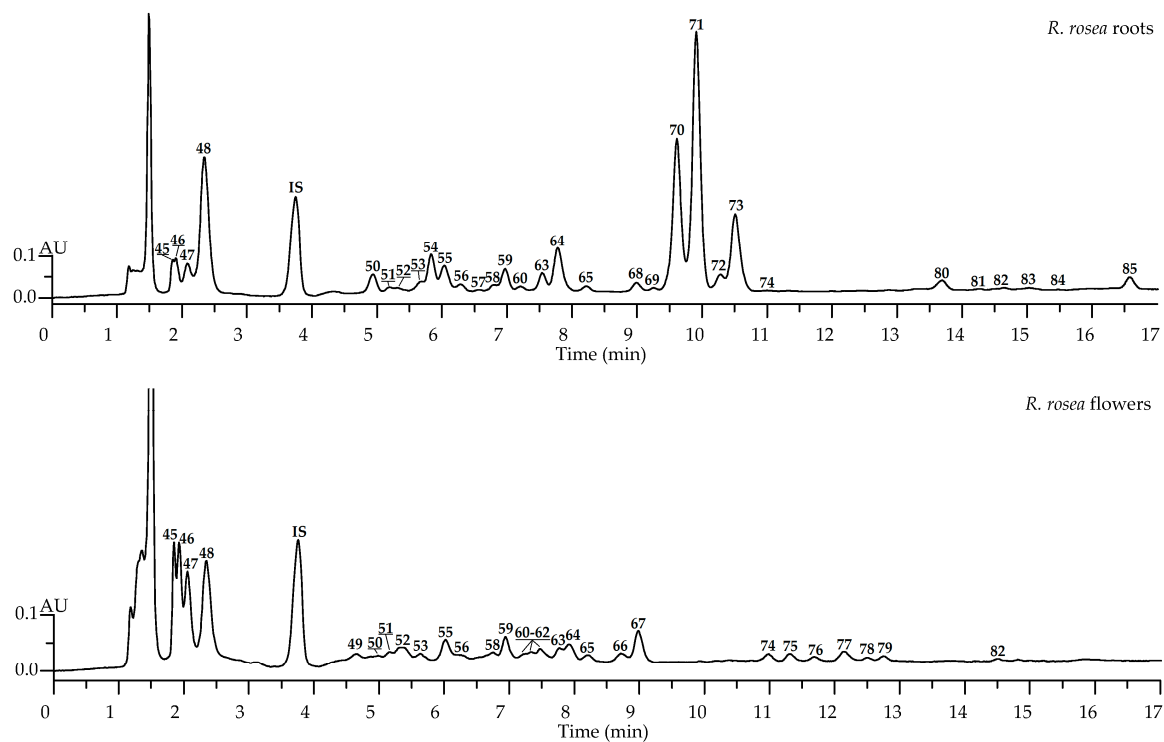

**Figure S2.** HPLC-DAD chromatograms (UV detector  $\lambda$  210 nm) of polyamide eluates I of *R. rosea* organ extracts. Compounds are numbered as listed in Table 4. IS—internal standard (picein, 250  $\mu\text{g/mL}$ ).

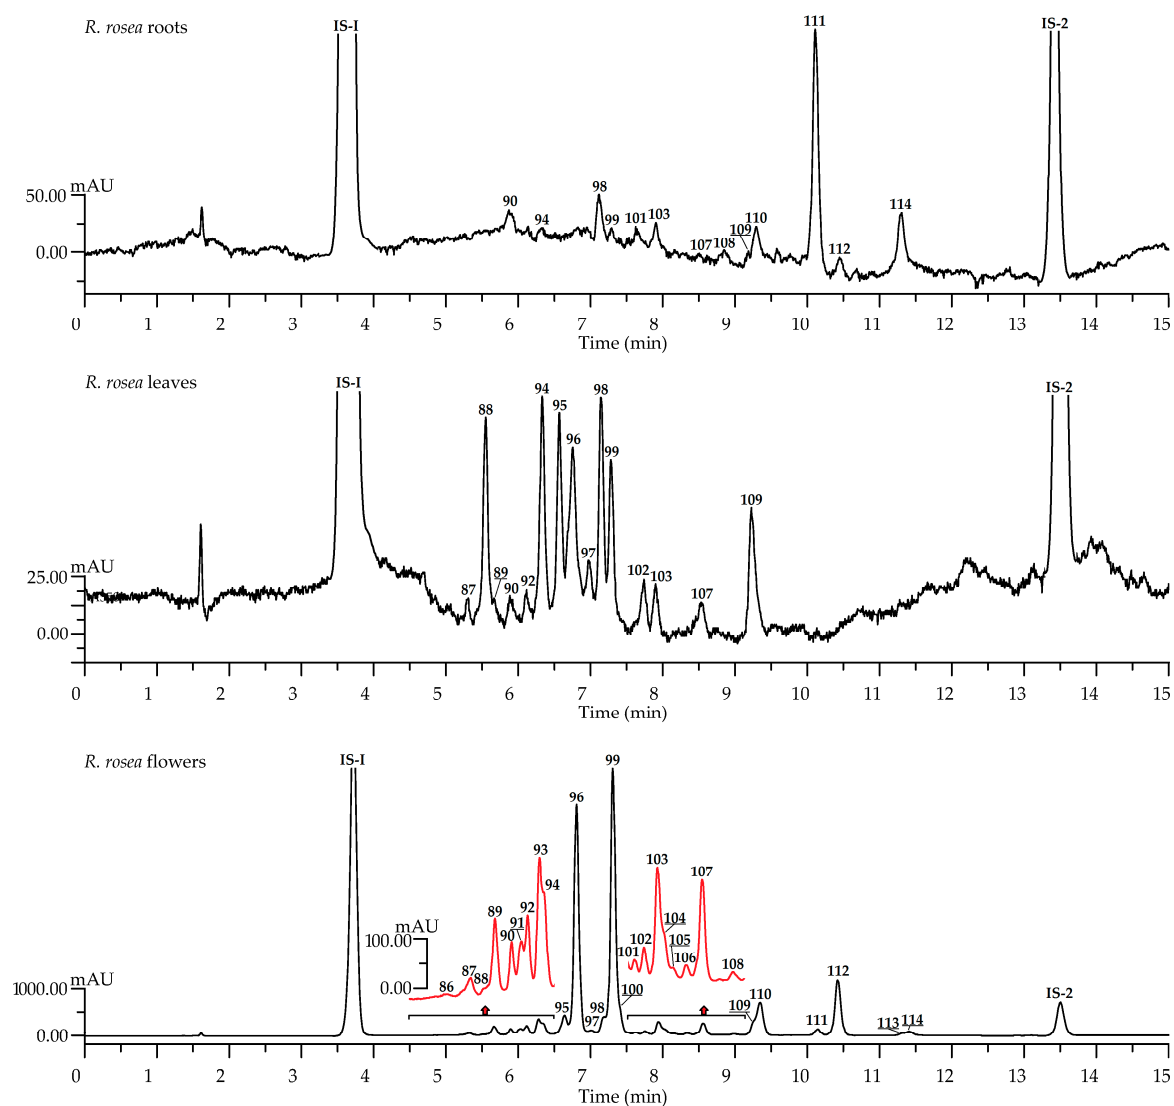

**Figure S3.** High-Performance Liquid Chromatography with Electrospray Ionization Triple Quadrupole Mass Spectrometric Detection (HPLC-ESI-QQQ-MS) chromatograms (base peak chromatogram or BPC mode, negative ionization) of polyamide eluates II of *R. rosea* organ extracts. Compounds are numbered as listed in Table 4. IS-I—internal standard I (scopoletin-7-*O*-neohesperidoside, 250  $\mu\text{g}/\text{mL}$ ); IS-II—internal standard II (isorhamnetin, 125  $\mu\text{g}/\text{mL}$ ). Red inserts—enlarged fragments of chromatogram.

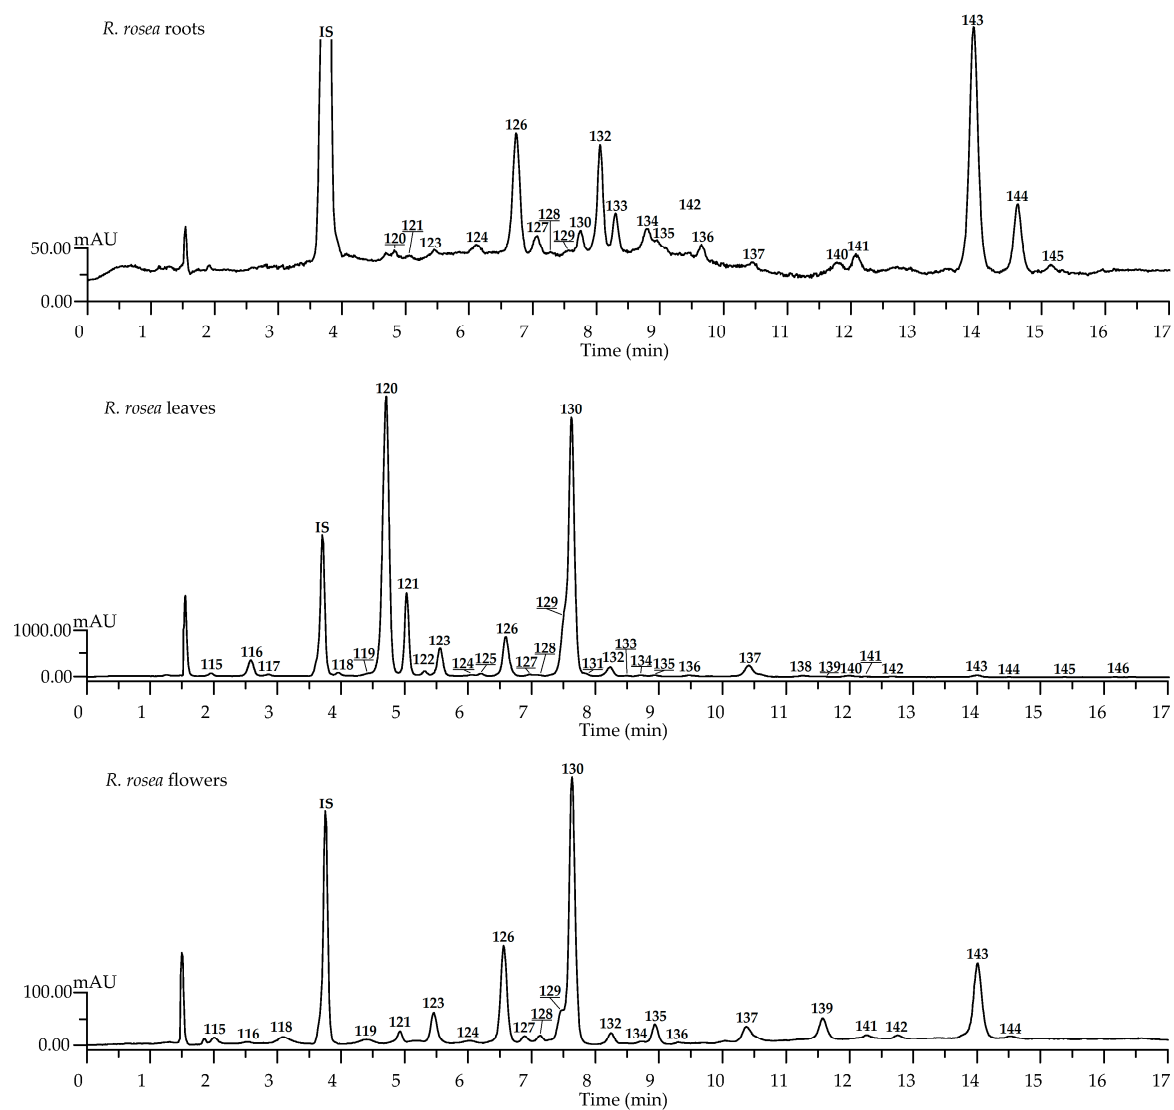

**Figure S4.** HPLC-ESI-QQQ-MS chromatograms (base peak chromatogram or BPC mode, negative ionization) of polyamide eluates III of *R. rosea* organ extracts. Compounds are numbered as listed in Table 4. IS-I—internal standard (4-*O*-caffeoylquinic acid, 200  $\mu\text{g/mL}$ ).

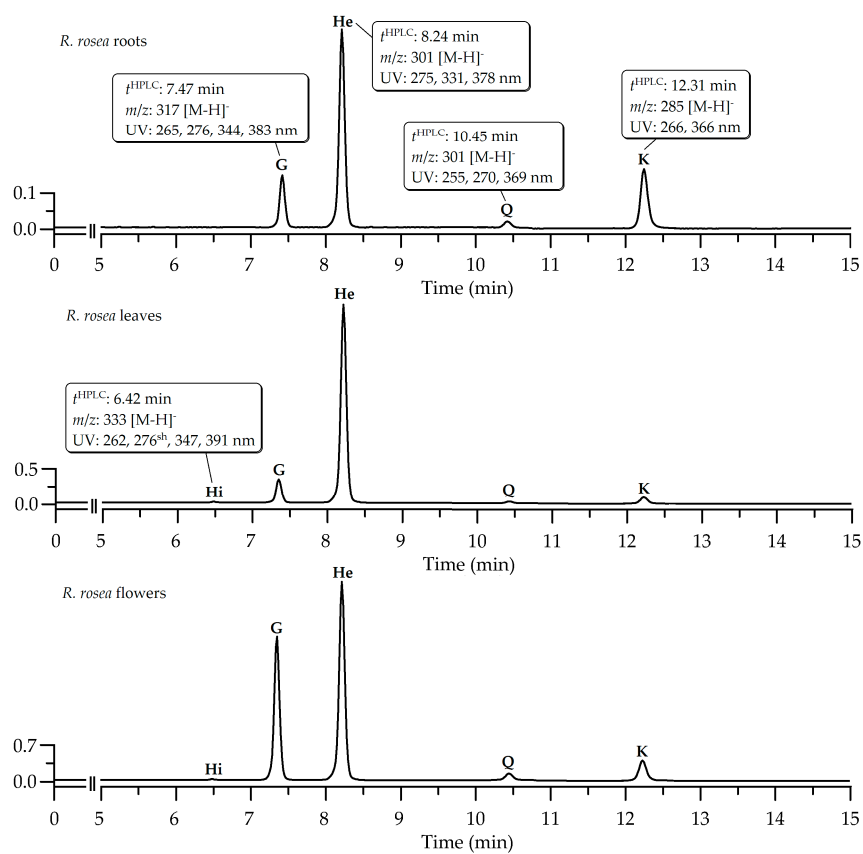

**Figure S5.** HPLC-DAD chromatograms (detector  $\lambda$  350 nm) of hydrolysates of total extracts of *R. rosea* organ extracts. G—gossypetin; He—herbacetin; Hi—hibiscetin; K—kaempferol; Q—quercetin. In windows: HPLC retention times ( $t^{\text{HPLC}}$ ), ESI-MS data ( $m/z$ ) and UV spectral maxima (UV).

**Table S1.** Reference standards used for the qualitative and quantitative analysis by HPLC-DAD-ESI-QQQ-MS and HPLC-DAD assays.

| No <sup>a</sup>      | Compound <sup>b</sup>                                           | Standard                                   | Purity, % | Manufacturer (No) <sup>c</sup> |
|----------------------|-----------------------------------------------------------------|--------------------------------------------|-----------|--------------------------------|
| 1 <sup>MS</sup>      | 1- <i>O</i> -Galloyl glucose                                    | 1- <i>O</i> -Galloyl glucose               | ≥ 90      | Sigma (69288)                  |
| 2 <sup>MS</sup>      | <i>O</i> -Galloyl glucose                                       | 1- <i>O</i> -Galloyl glucose               | ≥ 90      | Sigma (69288)                  |
| 3 <sup>MS</sup>      | <i>O</i> -Galloyl glucose                                       | 1- <i>O</i> -Galloyl glucose               | ≥ 90      | Sigma (69288)                  |
| 4 <sup>MS</sup>      | <i>O</i> -Galloyl glucose                                       | 1- <i>O</i> -Galloyl glucose               | ≥ 90      | Sigma (69288)                  |
| 5 <sup>MS</sup>      | Gallic acid                                                     | Gallic acid                                | ≥ 97      | Sigma (G7384)                  |
| 6 <sup>MS</sup>      | Di- <i>O</i> -galloyl glucose                                   | 1,6-Di- <i>O</i> -galloyl glucose          | ≥ 92      | Toronto (D293195)              |
| 7 <sup>MS,DAD</sup>  | 1,6-Di- <i>O</i> -galloyl glucose                               | 1,6-Di- <i>O</i> -galloyl glucose          | ≥ 92      | Toronto (D293195)              |
| 8 <sup>MS</sup>      | Procyanidin dimer (EGC-EGC)                                     | Procyanidin B <sub>1</sub>                 | ≥ 90      | Extrasynthese (0983)           |
| 9 <sup>MS</sup>      | Gallocatechin                                                   | (+)Gallocatechin                           | ≥ 98      | Extrasynthese (09735)          |
| 10 <sup>MS</sup>     | Epigallocatechin                                                | (-)Epigallocatechin                        | ≥ 98      | Extrasynthese (09795)          |
| 11 <sup>MS,DAD</sup> | Procyanidin dimer (EGC-EGCG)                                    | Procyanidin B <sub>1</sub>                 | ≥ 90      | Extrasynthese (0983)           |
| 12 <sup>MS</sup>     | Catechin                                                        | (+)Catechin                                | ≥ 99      | Extrasynthese (09765)          |
| 13 <sup>MS</sup>     | Tri- <i>O</i> -galloyl glucose                                  | 1,3,6-Tri- <i>O</i> -galloyl glucose       | ≥ 90      | Sigma (78864)                  |
| 14 <sup>MS</sup>     | Procyanidin dimer (EGCG-EGCG)                                   | Procyanidin B <sub>1</sub>                 | ≥ 90      | Extrasynthese (0983)           |
| 15 <sup>MS</sup>     | Procyanidin trimer (EGC-EGC-EGC)                                | Procyanidin B <sub>1</sub>                 | ≥ 90      | Extrasynthese (0983)           |
| 16 <sup>MS,DAD</sup> | Procyanidin trimer (EGC-EGC-EGCG)                               | Procyanidin B <sub>1</sub>                 | ≥ 90      | Extrasynthese (0983)           |
| 17 <sup>MS</sup>     | 1,3,6-Tri- <i>O</i> -galloyl glucose                            | 1,3,6-Tri- <i>O</i> -galloyl glucose       | ≥ 90      | Sigma (78864)                  |
| 18 <sup>MS</sup>     | Tri- <i>O</i> -galloyl glucose                                  | 1,3,6-Tri- <i>O</i> -galloyl glucose       | ≥ 90      | Sigma (78864)                  |
| 19 <sup>MS</sup>     | Procyanidin trimer (EGC-EGCG-EGCG)                              | Procyanidin B <sub>1</sub>                 | ≥ 90      | Extrasynthese (0983)           |
| 20 <sup>MS</sup>     | Procyanidin trimer (EGCG-EGCG-EGCG)                             | Procyanidin B <sub>1</sub>                 | ≥ 90      | Extrasynthese (0983)           |
| 21 <sup>MS</sup>     | Procyanidin tetramer (EGC-EGC-EGC-EGCG)                         | Procyanidin B <sub>1</sub>                 | ≥ 90      | Extrasynthese (0983)           |
| 22 <sup>MS,DAD</sup> | Epicatechin                                                     | (-)Epicatechin                             | ≥ 99      | Extrasynthese (09775)          |
| 23 <sup>MS,DAD</sup> | Epigallocatechin gallate                                        | (-)Epigallocatechin gallate                | ≥ 98      | Extrasynthese (09815)          |
| 24 <sup>MS,DAD</sup> | Gallocatechin gallate                                           | (+)Gallocatechin gallate                   | ≥ 98      | Extrasynthese (09745)          |
| 25 <sup>MS</sup>     | Procyanidin tetramer (EGC-EGC-EGCG-EGCG)                        | Procyanidin B <sub>1</sub>                 | ≥ 90      | Extrasynthese (0983)           |
| 26 <sup>MS</sup>     | Procyanidin tetramer (EGC-EGCG-EGCG-EGCG)                       | Procyanidin B <sub>1</sub>                 | ≥ 90      | Extrasynthese (0983)           |
| 27 <sup>MS</sup>     | Tetra- <i>O</i> -galloyl glucose                                | 1,2,3,6-Tetra- <i>O</i> -galloyl glucose   | ≥ 98      | BioBioPha (BBPP05354)          |
| 28 <sup>MS</sup>     | 1,2,3,6-Tetra- <i>O</i> -galloyl glucose                        | 1,2,3,6-Tetra- <i>O</i> -galloyl glucose   | ≥ 98      | BioBioPha (BBPP05354)          |
| 29 <sup>MS</sup>     | Tetra- <i>O</i> -galloyl glucose                                | 1,2,3,6-Tetra- <i>O</i> -galloyl glucose   | ≥ 98      | BioBioPha (BBPP05354)          |
| 30 <sup>MS,DAD</sup> | Epicatechin gallate                                             | (-)Epicatechin gallate                     | ≥ 97.5    | Extrasynthese (09785)          |
| 31 <sup>MS</sup>     | Tetra- <i>O</i> -galloyl glucose                                | 1,2,3,6-Tetra- <i>O</i> -galloyl glucose   | ≥ 98      | BioBioPha (BBPP05354)          |
| 32 <sup>MS,DAD</sup> | Penta- <i>O</i> -galloyl glucose                                | 1,2,3,4,6-Penta- <i>O</i> -galloyl glucose | ≥ 96      | Sigma (67548)                  |
| 33 <sup>MS,DAD</sup> | 1,2,3,4,6-Penta- <i>O</i> -galloyl glucose                      | 1,2,3,4,6-Penta- <i>O</i> -galloyl glucose | ≥ 96      | Sigma (67548)                  |
| 34 <sup>MS,DAD</sup> | Hexa- <i>O</i> -galloyl glucose                                 | 1,2,3,4,6-Penta- <i>O</i> -galloyl glucose | ≥ 96      | Sigma (67548)                  |
| 35 <sup>MS,DAD</sup> | Hexa- <i>O</i> -galloyl glucose                                 | 1,2,3,4,6-Penta- <i>O</i> -galloyl glucose | ≥ 96      | Sigma (67548)                  |
| 36 <sup>MS</sup>     | Catechin gallate                                                | (+)Catechin gallate                        | ≥ 98      | Extrasynthese (09725)          |
| 37 <sup>MS,DAD</sup> | Hepta- <i>O</i> -galloyl glucose                                | 1,2,3,4,6-Penta- <i>O</i> -galloyl glucose | ≥ 96      | Sigma (67548)                  |
| 38 <sup>MS,DAD</sup> | Hepta- <i>O</i> -galloyl glucose                                | 1,2,3,4,6-Penta- <i>O</i> -galloyl glucose | ≥ 96      | Sigma (67548)                  |
| 39 <sup>MS</sup>     | Octa- <i>O</i> -galloyl glucose                                 | 1,2,3,4,6-Penta- <i>O</i> -galloyl glucose | ≥ 96      | Sigma (67548)                  |
| 40 <sup>MS</sup>     | Octa- <i>O</i> -galloyl glucose                                 | 1,2,3,4,6-Penta- <i>O</i> -galloyl glucose | ≥ 96      | Sigma (67548)                  |
| 41 <sup>MS</sup>     | Procyanidin tetramer (EGCG-EGCG-EGCG-EGCG)                      | Procyanidin B <sub>1</sub>                 | ≥ 90      | Extrasynthese (0983)           |
| 42 <sup>MS</sup>     | Procyanidin pentamer (EGC-EGC-EGC-EGC-EGCG)                     | Procyanidin B <sub>1</sub>                 | ≥ 90      | Extrasynthese (0983)           |
| 43 <sup>MS</sup>     | Procyanidin pentamer (EGC-EGC-EGC-EGCG-EGCG)                    | Procyanidin B <sub>1</sub>                 | ≥ 90      | Extrasynthese (0983)           |
| 44 <sup>MS</sup>     | Procyanidin pentamer (EGC-EGC-EGCG-EGCG-EGCG)                   | Procyanidin B <sub>1</sub>                 | ≥ 90      | Extrasynthese (0983)           |
| 45 <sup>MS</sup>     | Hydroquinone <i>O</i> -Hex- <i>O</i> -Pent                      | Arbutin                                    | ≥ 98      | Sigma (A4256)                  |
| 46 <sup>MS,DAD</sup> | Hydroquinone <i>O</i> -Glc (=arbutin)                           | Arbutin                                    | ≥ 98      | Sigma (A4256)                  |
| 47 <sup>MS</sup>     | Tyrosol <i>O</i> -Hex- <i>O</i> -Pent                           | Salidroside                                | ≥ 98      | Sigma (43866)                  |
| 48 <sup>MS,DAD</sup> | Tyrosol <i>O</i> -Glc (=salidroside)                            | Salidroside                                | ≥ 98      | Sigma (43866)                  |
| 49 <sup>MS</sup>     | Tyrosol <i>O</i> -dHex                                          | Salidroside                                | ≥ 98      | Sigma (43866)                  |
| 50 <sup>MS</sup>     | Tyrosol (=p-hydroxyphenethyl alcohol)                           | Tyrosol                                    | ≥ 98      | Sigma (188255)                 |
| 51 <sup>MS</sup>     | Benzyl alcohol <i>O</i> -Hex- <i>O</i> -Pent                    | Benzyl alcohol                             | ≥ 99.8    | Sigma (305197)                 |
| 52 <sup>MS</sup>     | Benzyl alcohol <i>O</i> -Hex- <i>O</i> -Pent                    | Benzyl alcohol                             | ≥ 99.8    | Sigma (305197)                 |
| 53 <sup>MS</sup>     | Benzyl alcohol <i>O</i> -Hex                                    | Benzyl alcohol                             | ≥ 99.8    | Sigma (305197)                 |
| 54 <sup>MS</sup>     | <i>p</i> -Hydroxycinnamyl alcohol <i>O</i> -Hex- <i>O</i> -Pent | Triandrin                                  | ≥ 98.5    | BioBioPha (BBP05330)           |
| 55 <sup>MS</sup>     | <i>p</i> -Hydroxycinnamyl alcohol <i>O</i> -Glc (=triandrin)    | Triandrin                                  | ≥ 98.5    | BioBioPha (BBP05330)           |
| 56 <sup>MS</sup>     | Benzyl alcohol                                                  | Benzyl alcohol                             | ≥ 99.8    | Sigma (305197)                 |
| 57 <sup>MS</sup>     | Rhodiocyanoside A/D <i>O</i> -Pent                              | Rhodiocyanoside A                          | ≥ 98      | ChemFaces (CFN90973)           |
| 58 <sup>MS</sup>     | Rhodiocyanoside D                                               | Rhodiocyanoside A                          | ≥ 98      | ChemFaces (CFN90973)           |
| 59 <sup>MS</sup>     | Rhodiocyanoside A                                               | Rhodiocyanoside A                          | ≥ 98      | ChemFaces (CFN90973)           |
| 60 <sup>MS</sup>     | Rosiridol di- <i>O</i> -Hex- <i>O</i> -Pent                     | Rosiridin                                  | ≥ 98      | ChemFaces (CFN99181)           |
| 61 <sup>MS</sup>     | Rosiridol <i>O</i> -Hex-di- <i>O</i> -Pent                      | Rosiridin                                  | ≥ 98      | ChemFaces (CFN99181)           |
| 62 <sup>MS</sup>     | Rosiridol <i>O</i> -Hex-di- <i>O</i> -Pent                      | Rosiridin                                  | ≥ 98      | ChemFaces (CFN99181)           |
| 63 <sup>MS</sup>     | Rosiridol <i>O</i> -Hex- <i>O</i> -Pent                         | Rosiridin                                  | ≥ 98      | ChemFaces (CFN99181)           |
| 64 <sup>MS</sup>     | Rosiridol <i>O</i> -Hex- <i>O</i> -Pent                         | Rosiridin                                  | ≥ 98      | ChemFaces (CFN99181)           |
| 65 <sup>MS</sup>     | Tyrosol <i>O</i> -Hex- <i>O</i> -Ac                             | Salidroside                                | ≥ 98      | Sigma (43866)                  |
| 66 <sup>MS</sup>     | Tyrosol <i>O</i> -Hex- <i>O</i> -Ac                             | Salidroside                                | ≥ 98      | Sigma (43866)                  |
| 67 <sup>MS</sup>     | Tyrosol <i>O</i> -Hex-di- <i>O</i> -Ac                          | Salidroside                                | ≥ 98      | Sigma (43866)                  |
| 68 <sup>MS</sup>     | Cinnamyl alcohol <i>O</i> -Hex-di- <i>O</i> -Pent               | Rosavin                                    | ≥ 98      | Sigma (SML0336)                |
| 69 <sup>MS</sup>     | Cinnamyl alcohol <i>O</i> -Hex-di- <i>O</i> -Pent               | Rosavin                                    | ≥ 98      | Sigma (SML0336)                |
| 70 <sup>MS,DAD</sup> | Cinnamyl alcohol <i>O</i> -(6'- <i>O</i> -Araf)-Glc (=rosarin)  | Rosarin                                    | ≥ 98      | Sigma (SMB00315)               |

Table S1. Cont.

| No                    | Compound <sup>a</sup>                                                               | Standard                                     | Purity, % | Manufacturer (No) <sup>b</sup> |
|-----------------------|-------------------------------------------------------------------------------------|----------------------------------------------|-----------|--------------------------------|
| 71 <sup>MS,DAD</sup>  | Cinnamyl alcohol <i>O</i> -(6'- <i>O</i> -Arap)-Glc (=rosavin)                      | Rosavin                                      | ≥ 98      | Sigma (SML0336)                |
| 72 <sup>MS</sup>      | Cinnamyl alcohol <i>O</i> -Hex- <i>O</i> -Pent                                      | Rosavin                                      | ≥ 98      | Sigma (SML0336)                |
| 73 <sup>MS,DAD</sup>  | Cinnamyl alcohol <i>O</i> -Glc (=rosin)                                             | Rosin                                        | ≥ 98      | Sigma (PHL89902)               |
| 74 <sup>MS</sup>      | Rosiridol 1- <i>O</i> -Glc (=rosiridin)                                             | Rosiridin                                    | ≥ 98      | ChemFaces (CFN99181)           |
| 75 <sup>MS</sup>      | <i>p</i> -Hydroxycinnamyl alcohol <i>O</i> -Hex- <i>O</i> -Ac                       | Rosin                                        | ≥ 98      | Sigma (PHL89902)               |
| 76 <sup>MS</sup>      | <i>p</i> -Hydroxycinnamyl alcohol <i>O</i> -Hex- <i>O</i> -Ac                       | Rosin                                        | ≥ 98      | Sigma (PHL89902)               |
| 77 <sup>MS</sup>      | Rosiridol <i>O</i> -Hex- <i>O</i> -Ac                                               | Rosiridin                                    | ≥ 98      | ChemFaces (CFN99181)           |
| 78 <sup>MS</sup>      | Rosiridol <i>O</i> -Hex-di- <i>O</i> -Ac                                            | Rosiridin                                    | ≥ 98      | ChemFaces (CFN99181)           |
| 79 <sup>MS</sup>      | Rosiridol <i>O</i> -Hex-di- <i>O</i> -Ac                                            | Rosiridin                                    | ≥ 98      | ChemFaces (CFN99181)           |
| 80 <sup>MS</sup>      | <i>p</i> -Methoxycinnamyl alcohol <i>O</i> -Hex- <i>O</i> -Pent                     | Vimalin                                      | ≥ 92      | VILAR (0316)                   |
| 81 <sup>MS</sup>      | <i>p</i> -Methoxycinnamyl alcohol <i>O</i> -Hex- <i>O</i> -Pent                     | Vimalin                                      | ≥ 92      | VILAR (0316)                   |
| 82 <sup>MS</sup>      | <i>p</i> -Methoxycinnamyl alcohol <i>O</i> -Glc (=vimalin)                          | Vimalin                                      | ≥ 92      | VILAR (0316)                   |
| 83 <sup>MS</sup>      | Cinnamyl alcohol                                                                    | Cinnamyl alcohol                             | ≥ 98      | Sigma (108197)                 |
| 84 <sup>MS</sup>      | Cinnamic acid                                                                       | Cinnamic acid                                | ≥ 99      | Sigma (C80857)                 |
| 85 <sup>MS</sup>      | <i>p</i> -Methoxycinnamyl alcohol                                                   | <i>p</i> -Methoxycinnamyl alcohol            | ≥ 98      | ChemFaces (CFN89230)           |
| 86 <sup>MS</sup>      | Kaempferol tri- <i>O</i> -Hex- <i>O</i> -dHex (S37)                                 | Astragalol                                   | ≥ 97      | Sigma (79851)                  |
| 87 <sup>MS</sup>      | Herbacetin tri- <i>O</i> -Hex- <i>O</i> -dHex (S78)                                 | Herbacin                                     | ≥ 90      | VulcanChem (VC382803)          |
| 88 <sup>MS</sup>      | Gossypetin di- <i>O</i> -Hex- <i>O</i> -dHex (S78)                                  | Hibifolin                                    | ≥ 90      | Sigma (PHL83580)               |
| 89 <sup>MS</sup>      | Quercetin di- <i>O</i> -Hex- <i>O</i> -dHex (S37)                                   | Isoquercitrin                                | ≥ 98      | Sigma (16654)                  |
| 90 <sup>MS</sup>      | Kaempferol di- <i>O</i> -Hex- <i>O</i> -dHex (S37)                                  | Kaempferol 7- <i>O</i> -Rha                  | ≥ 98      | ChemFaces (CFN016224)          |
| 91 <sup>MS</sup>      | Gossypetin di- <i>O</i> -Hex (S8)                                                   | Hibifolin                                    | ≥ 90      | Sigma (PHL83580)               |
| 92 <sup>MS</sup>      | Herbacetin di- <i>O</i> -Hex- <i>O</i> -dHex (S78)                                  | Herbacin                                     | ≥ 90      | VulcanChem (VC382803)          |
| 93 <sup>MS</sup>      | Gossypetin di- <i>O</i> -Hex (S38)                                                  | Hibifolin                                    | ≥ 90      | Sigma (PHL83580)               |
| 94 <sup>MS</sup>      | Gossypetin 7- <i>O</i> -(3''- <i>O</i> -Glc)-Rha (=rhodiolflavonoside)              | Herbacin                                     | ≥ 90      | VulcanChem (VC382803)          |
| 95 <sup>MS</sup>      | Herbacetin 7- <i>O</i> -(3''- <i>O</i> -Glc)-Rha (=rhodiosin)                       | Rhodionin                                    | ≥ 98      | ChemFaces (CFN99758)           |
| 96 <sup>MS,DAD</sup>  | Gossypetin 7- <i>O</i> -Rha-8- <i>O</i> -Glc (=rhodiolidin)                         | Herbacin                                     | ≥ 90      | VulcanChem (VC382803)          |
| 97 <sup>MS</sup>      | Kaempferol <i>O</i> -Hex- <i>O</i> -dHex (S7)                                       | Kaempferol 7- <i>O</i> -Rha                  | ≥ 98      | ChemFaces (CFN016224)          |
| 98 <sup>MS</sup>      | Herbacetin-8- <i>O</i> -Xyl (=rhodalol)                                             | Herbacin                                     | ≥ 90      | VulcanChem (VC382803)          |
| 99 <sup>MS,DAD</sup>  | Herbacetin 7- <i>O</i> -Rha-8- <i>O</i> -Glc (=rhodionidin)                         | Herbacin                                     | ≥ 90      | VulcanChem (VC382803)          |
| 100 <sup>MS</sup>     | Quercetin 3,7-di- <i>O</i> -Glc                                                     | Quercetin 3,7-di- <i>O</i> -Glc              | ≥ 92      | VILAR (5284-97)                |
| 101 <sup>MS</sup>     | Kaempferol 3,7-di- <i>O</i> -Glc                                                    | Kaempferol 3,7-di- <i>O</i> -Glc             | ≥ 98      | ChemFaces (CFN91159)           |
| 102 <sup>MS</sup>     | Quercetin 3- <i>O</i> -Glc-7- <i>O</i> -Rha                                         | Quercetin 3- <i>O</i> -Glc-7- <i>O</i> -Rha  | ≥ 98      | ChemFaces (CFN90738)           |
| 103 <sup>MS</sup>     | Kaempferol 3- <i>O</i> -Glc-7- <i>O</i> -Rha                                        | Kaempferol 3- <i>O</i> -Glc-7- <i>O</i> -Rha | ≥ 90      | VulcanChem (VC383277)          |
| 104 <sup>MS</sup>     | Gossypetin 8- <i>O</i> -Glc (=gossypin)                                             | Gossypin                                     | ≥ 90      | Sigma (SML0761)                |
| 105 <sup>MS</sup>     | Kaempferol 3,7-di- <i>O</i> -Rha (=kaempferitrin)                                   | Kaempferitrin                                | ≥ 98      | ChemFaces (CFN98756)           |
| 106 <sup>MS</sup>     | Gossypetin 7- <i>O</i> -Rha (=rhodiogin)                                            | Rhodiogin                                    | ≥ 92      | VILAR (3710-87)                |
| 107 <sup>MS</sup>     | Quercetin 3- <i>O</i> -Glc (=isoquercitrin)                                         | Isoquercitrin                                | ≥ 98      | Sigma (16654)                  |
| 108 <sup>MS</sup>     | Quercetin 3- <i>O</i> -Rha (=quercitrin)                                            | Quercitrin                                   | ≥ 98      | Sigma (740580)                 |
| 109 <sup>MS</sup>     | Herbacetin 8- <i>O</i> -Glc (=herbacin)                                             | Herbacin                                     | ≥ 90      | VulcanChem (VC382803)          |
| 110 <sup>MS</sup>     | Herbacetin <i>O</i> -dHex (S8)                                                      | Herbacin                                     | ≥ 90      | VulcanChem (VC382803)          |
| 111 <sup>MS</sup>     | Kaempferol 3- <i>O</i> -Rha (=afzelin)                                              | Afzelin                                      | ≥ 98      | Sigma (PHL83864)               |
| 112 <sup>MS</sup>     | Herbacetin 7- <i>O</i> -Rha (=rhodionin)                                            | Rhodionin                                    | ≥ 98      | ChemFaces (CFN99758)           |
| 113 <sup>MS</sup>     | Herbacetin <i>O</i> -dHex (S3)                                                      | Herbacin                                     | ≥ 90      | VulcanChem (VC382803)          |
| 114 <sup>MS</sup>     | Kaempferol 7- <i>O</i> -Rha                                                         | Kaempferol 7- <i>O</i> -Rha                  | ≥ 98      | ChemFaces (CFN016224)          |
| 115 <sup>MS</sup>     | Hibiscetin di- <i>O</i> -Hex- <i>O</i> -HexA (S38)                                  | Hibifolin                                    | ≥ 90      | Sigma (PHL83580)               |
| 116 <sup>MS</sup>     | Gossypetin di- <i>O</i> -Hex- <i>O</i> -HexA (S378)                                 | Hibifolin                                    | ≥ 90      | Sigma (PHL83580)               |
| 117 <sup>MS</sup>     | Gossypetin <i>O</i> -Ac-di- <i>O</i> -Hex- <i>O</i> -HexA (S378)                    | Hibifolin                                    | ≥ 90      | Sigma (PHL83580)               |
| 118 <sup>MS</sup>     | Gossypetin <i>O</i> -Ac-di- <i>O</i> -Hex- <i>O</i> -HexA (S378)                    | Hibifolin                                    | ≥ 90      | Sigma (PHL83580)               |
| 119 <sup>MS</sup>     | Herbacetin di- <i>O</i> -Hex- <i>O</i> -HexA (S38)                                  | Herbacin                                     | ≥ 90      | VulcanChem (VC382803)          |
| 120 <sup>MS,DAD</sup> | Herbacetin di- <i>O</i> -Hex- <i>O</i> -HexA (S378)                                 | Herbacin                                     | ≥ 90      | VulcanChem (VC382803)          |
| 121 <sup>MS</sup>     | Herbacetin <i>O</i> -Mal-di- <i>O</i> -Hex- <i>O</i> -HexA (S378)                   | Herbacin                                     | ≥ 90      | VulcanChem (VC382803)          |
| 122 <sup>MS</sup>     | Herbacetin <i>O</i> -Ac-di- <i>O</i> -Hex- <i>O</i> -HexA (S378)                    | Herbacin                                     | ≥ 90      | VulcanChem (VC382803)          |
| 123 <sup>MS</sup>     | Hibiscetin <i>O</i> -Hex- <i>O</i> -HexA (S38)                                      | Hibifolin                                    | ≥ 90      | Sigma (PHL83580)               |
| 124 <sup>MS</sup>     | Hibiscetin <i>O</i> -Mal- <i>O</i> -Hex- <i>O</i> -HexA (S38)                       | Hibifolin                                    | ≥ 90      | Sigma (PHL83580)               |
| 125 <sup>MS</sup>     | Hibiscetin <i>O</i> -Ac- <i>O</i> -Hex- <i>O</i> -HexA (S38)                        | Hibifolin                                    | ≥ 90      | Sigma (PHL83580)               |
| 126 <sup>MS</sup>     | Gossypetin 3- <i>O</i> -Glc-8- <i>O</i> -GlcA                                       | Hibifolin                                    | ≥ 90      | Sigma (PHL83580)               |
| 127 <sup>MS</sup>     | Gossypetin 3- <i>O</i> -(3''- <i>O</i> -Ac)-Glc-8- <i>O</i> -GlcA (=rhodiquadrin B) | Hibifolin                                    | ≥ 90      | Sigma (PHL83580)               |
| 128 <sup>MS</sup>     | 5- <i>O</i> -Feruloylquinic acid                                                    | 5- <i>O</i> -Feruloylquinic acid             | ≥ 98      | ChemFaces (CFN92889)           |
| 129 <sup>MS</sup>     | Herbacetin 8- <i>O</i> -(2''- <i>O</i> -Glc)-GlcA (=rhodiquadrin C)                 | Herbacin                                     | ≥ 90      | VulcanChem (VC382803)          |
| 130 <sup>MS,DAD</sup> | Herbacetin 3- <i>O</i> -Glc-8- <i>O</i> -GlcA                                       | Herbacin                                     | ≥ 90      | VulcanChem (VC382803)          |
| 131 <sup>MS</sup>     | Herbacetin <i>O</i> -Ac- <i>O</i> -Hex- <i>O</i> -HexA (S3,8)                       | Herbacin                                     | ≥ 90      | VulcanChem (VC382803)          |
| 132 <sup>MS</sup>     | Herbacetin 3- <i>O</i> -(3''- <i>O</i> -Ac)-Glc-8- <i>O</i> -GlcA                   | Herbacin                                     | ≥ 90      | VulcanChem (VC382803)          |
| 133 <sup>MS</sup>     | Gossypetin di- <i>O</i> -Ac- <i>O</i> -Hex- <i>O</i> -HexA (S3,8)                   | Hibifolin                                    | ≥ 90      | Sigma (PHL83580)               |
| 134 <sup>MS</sup>     | Gossypetin di- <i>O</i> -Ac- <i>O</i> -Hex- <i>O</i> -HexA (S3,8)                   | Hibifolin                                    | ≥ 90      | Sigma (PHL83580)               |
| 135 <sup>MS</sup>     | Herbacetin <i>O</i> -Ac- <i>O</i> -Hex- <i>O</i> -HexA (S3,8)                       | Herbacin                                     | ≥ 90      | VulcanChem (VC382803)          |
| 136 <sup>MS</sup>     | Herbacetin <i>O</i> -Ac- <i>O</i> -Hex- <i>O</i> -HexA (S3,8)                       | Herbacin                                     | ≥ 90      | VulcanChem (VC382803)          |
| 137 <sup>MS</sup>     | Herbacetin di- <i>O</i> -Ac- <i>O</i> -Hex- <i>O</i> -HexA (S3,8)                   | Herbacin                                     | ≥ 90      | VulcanChem (VC382803)          |
| 138 <sup>MS</sup>     | Gossypetin 8- <i>O</i> -GlcA (=hibifolin)                                           | Hibifolin                                    | ≥ 90      | Sigma (PHL83580)               |
| 139 <sup>MS</sup>     | Gossypetin <i>O</i> -Mal- <i>O</i> -HexA (S8)                                       | Hibifolin                                    | ≥ 90      | Sigma (PHL83580)               |
| 140 <sup>MS</sup>     | Gossypetin <i>O</i> -Mal- <i>O</i> -HexA (S8)                                       | Hibifolin                                    | ≥ 90      | Sigma (PHL83580)               |
| 141 <sup>MS</sup>     | Gossypetin <i>O</i> -Ac- <i>O</i> -HexA (S8)                                        | Hibifolin                                    | ≥ 90      | Sigma (PHL83580)               |



Table S1. Cont.

| No                | Compound <sup>a</sup>                         | Standard  | Purity, % | Manufacturer (No) <sup>b</sup> |
|-------------------|-----------------------------------------------|-----------|-----------|--------------------------------|
| 142 <sup>MS</sup> | Gossypetin <i>O</i> -Ac- <i>O</i> -HexA (S8)  | Hibifolin | ≥ 90      | Sigma (PHL83580)               |
| 143 <sup>MS</sup> | Herbacetin 8- <i>O</i> -GlcA (=melocorin)     | Herbacin  | ≥ 90      | VulcanChem (VC382803)          |
| 144 <sup>MS</sup> | Herbacetin <i>O</i> -Mal- <i>O</i> -HexA (S8) | Herbacin  | ≥ 90      | VulcanChem (VC382803)          |
| 145 <sup>MS</sup> | Herbacetin <i>O</i> -Ac- <i>O</i> -HexA (S8)  | Herbacin  | ≥ 90      | VulcanChem (VC382803)          |
| 146 <sup>MS</sup> | Herbacetin <i>O</i> -Ac- <i>O</i> -HexA (S8)  | Herbacin  | ≥ 90      | VulcanChem (VC382803)          |

<sup>a</sup> Standards used in chromatographic assays: <sup>MS</sup>—HPLC-DAD-ESI-QQQ-MS (Sections 2.5–2.7); <sup>DAD</sup>—HPLC-DAD (Section 2.9). <sup>b</sup> Abbreviation used: Ac—acetyl; Araf—arabinofuranose; Arap—arabinopyranose; Glc—glucose; GlcA—glucuronic acid; EGC—epigallocatechin unit; EGCG—epigallocatechin gallate unit; Hex—hexose; HexA—hexuronic acid; Mal—malonyl; Pent—pentose; Rha—rhamnose; Xyl—xylose. Substitution type of flavonol glycoside: S3—3-*O*-substituted; S8—8-*O*-substituted; S37—3,7-di-*O*-substituted; S78—7,8-di-*O*-substituted; S38—3,8-di-*O*-substituted; S378—3,7,8-tri-*O*-substituted; S?—unknown type of *O*-substitution. <sup>c</sup> Manufacturers list: BioBioPha—BioBioPha (Kunming, Yunnan, PRC); ChemFaces—ChemFaces (Wuhan, Hubei, PRC); Extrasynthese—Extrasynthese (Lyon, France); Sigma—Sigma-Aldrich (St. Louis, MO, USA); Toronto—Toronto Research Chemicals (North York, ON, Canada); VILAR—Research Institute of Medical and Aromatic Plants (Moscow, Russia); VulcanChem—VulcanChem (Pasadena, CA, USA).

**Table S2.** Regression equations, correlation coefficients ( $r^2$ ), standard deviation ( $S_{yx}$ ), limits of detection (LOD), limits of quantification (LOQ) and linear ranges for 44 reference standards used in HPLC-MS quantification.

| Compound                          | Ionization <sup>a</sup> | CE <sup>b</sup><br>(eV) | Regression equation <sup>c</sup> |                | $r^2$  | $S_{yx}$              | LOD/<br>LOQ<br>( $\mu\text{g/mL}$ ) | Linear<br>range<br>( $\mu\text{g/mL}$ ) |
|-----------------------------------|-------------------------|-------------------------|----------------------------------|----------------|--------|-----------------------|-------------------------------------|-----------------------------------------|
|                                   |                         |                         | $a$                              | $b \cdot 10^6$ |        |                       |                                     |                                         |
| Gallic acid                       | N                       | -20                     | 2.6538                           | -0.1376        | 0.9990 | $1.17 \cdot 10^{-2}$  | 0.01/0.04                           | 0.1–100.0                               |
| 1-O-Galloyl glucose               | N                       | -20                     | 1.3586                           | -0.0663        | 0.9987 | $9.69 \cdot 10^{-2}$  | 0.24/0.71                           | 0.8–100.0                               |
| 1,6-Di-O-galloyl glucose          | N                       | -20                     | 1.7552                           | -0.0569        | 0.9982 | $8.89 \cdot 10^{-2}$  | 0.18/0.51                           | 0.6–100.0                               |
| 1,3,6-Tri-O-galloyl glucose       | N                       | -25                     | 2.1064                           | -0.0499        | 0.9985 | $8.74 \cdot 10^{-2}$  | 0.14/0.42                           | 0.5–100.0                               |
| 1,2,3,6-Tetra-O-galloyl glucose   | N                       | -25                     | 2.0168                           | -0.0629        | 0.9973 | $9.00 \cdot 10^{-2}$  | 0.15/0.45                           | 0.5–100.0                               |
| 1,2,3,4,6-Penta-O-galloyl glucose | N                       | -25                     | 2.4561                           | -0.0171        | 0.9979 | $12.33 \cdot 10^{-2}$ | 0.17/0.50                           | 0.6–100.0                               |
| (+)Catechin                       | N                       | -35                     | 0.9562                           | -0.0521        | 0.9971 | $7.79 \cdot 10^{-2}$  | 0.27/0.82                           | 0.9–100.0                               |
| (-)Epicatechin                    | N                       | -35                     | 1.0828                           | -0.0456        | 0.9973 | $6.85 \cdot 10^{-2}$  | 0.21/0.63                           | 0.7–100.0                               |
| (+)Gallocatechin                  | N                       | -35                     | 1.1495                           | -0.2110        | 0.9982 | $17.02 \cdot 10^{-2}$ | 0.48/1.48                           | 1.5–100.0                               |
| (-)Epigallocatechin               | N                       | -35                     | 1.2824                           | -0.1440        | 0.9987 | $14.44 \cdot 10^{-2}$ | 0.37/1.12                           | 1.2–100.0                               |
| (+)Catechin gallate               | N                       | -35                     | 1.3387                           | -0.0284        | 0.9981 | $9.50 \cdot 10^{-2}$  | 0.23/0.71                           | 0.8–100.0                               |
| (-)Epicatechin gallate            | N                       | -35                     | 1.5152                           | -0.0523        | 0.9979 | $12.67 \cdot 10^{-2}$ | 0.28/0.84                           | 0.9–100.0                               |
| (+)Gallocatechin gallate          | N                       | -35                     | 1.5279                           | -0.1846        | 0.9972 | $14.95 \cdot 10^{-2}$ | 0.32/1.98                           | 1.0–100.0                               |
| (-)Epigallocatechin gallate       | N                       | -35                     | 1.5824                           | -0.1078        | 0.9965 | $16.25 \cdot 10^{-2}$ | 0.34/1.03                           | 1.1–100.0                               |
| Procyanidin B <sub>1</sub>        | N                       | -25                     | 1.3722                           | -0.0829        | 0.9973 | $9.93 \cdot 10^{-2}$  | 0.24/0.72                           | 0.8–100.0                               |
| Arbutin                           | N                       | -35                     | 0.1756                           | -0.0144        | 0.9967 | $3.01 \cdot 10^{-2}$  | 0.56/1.71                           | 2.0–100.0                               |
| Salidroside                       | N                       | -15                     | 2.0674                           | -0.1255        | 0.9972 | $9.34 \cdot 10^{-2}$  | 0.14/0.45                           | 0.5–100.0                               |
| Tyrosol                           | N                       | -15                     | 2.3277                           | -0.0933        | 0.9985 | $7.59 \cdot 10^{-2}$  | 0.11/0.33                           | 0.4–100.0                               |
| Benzyl alcohol                    | N                       | -18                     | 0.1408                           | -0.0193        | 0.9972 | $3.91 \cdot 10^{-2}$  | 0.91/2.78                           | 3.0–100.0                               |
| Triandrin                         | N                       | -28                     | 0.1916                           | -0.0217        | 0.9973 | $3.99 \cdot 10^{-2}$  | 0.68/2.08                           | 2.1–100.0                               |
| Rhodiocyanoside A                 | N                       | -25                     | 0.6284                           | -0.0517        | 0.9975 | $5.45 \cdot 10^{-2}$  | 0.29/0.87                           | 0.9–100.0                               |
| Rosiridin                         | N                       | -22                     | 0.8036                           | -0.0062        | 0.9979 | $7.49 \cdot 10^{-2}$  | 0.31/0.93                           | 1.0–100.0                               |
| Rosavin                           | N                       | -20                     | 0.8115                           | -0.1006        | 0.9980 | $2.25 \cdot 10^{-2}$  | 0.10/0.28                           | 0.3–100.0                               |
| Rosarin                           | N                       | -20                     | 0.8523                           | -0.1004        | 0.9982 | $2.08 \cdot 10^{-2}$  | 0.08/0.24                           | 0.3–100.0                               |
| Rosin                             | N                       | -20                     | 1.2374                           | -0.0924        | 0.9977 | $1.88 \cdot 10^{-2}$  | 0.05/0.15                           | 0.2–100.0                               |
| Vimalin                           | N                       | -35                     | 1.1242                           | -0.0315        | 0.9962 | $9.45 \cdot 10^{-2}$  | 0.28/0.84                           | 0.9–100.0                               |
| Cinnamyl alcohol                  | N                       | -20                     | 2.7287                           | -0.0752        | 0.9994 | $7.52 \cdot 10^{-2}$  | 0.09/0.28                           | 0.3–100.0                               |
| Cinnamic acid                     | N                       | -20                     | 2.4493                           | -0.0938        | 0.9989 | $1.85 \cdot 10^{-2}$  | 0.03/0.08                           | 0.1–100.0                               |
| <i>p</i> -Methoxycinnamyl alcohol | N                       | -35                     | 2.2145                           | -0.1038        | 0.9985 | $1.48 \cdot 10^{-2}$  | 0.02/0.07                           | 0.1–100.0                               |
| Astragalol                        | P                       | +20                     | 2.0859                           | -0.9171        | 0.9980 | $6.18 \cdot 10^{-2}$  | 0.03/0.09                           | 0.1–100.0                               |
| Afzelin                           | P                       | +30                     | 2.2126                           | -0.5160        | 0.9987 | $8.11 \cdot 10^{-2}$  | 0.12/0.37                           | 0.4–100.0                               |
| Kaempferol 7-O-Rha                | P                       | +35                     | 2.1821                           | -0.5407        | 0.9982 | $4.21 \cdot 10^{-2}$  | 0.06/0.20                           | 0.2–100.0                               |
| Kaempferitrin                     | P                       | +35                     | 1.6726                           | -0.6389        | 0.9975 | $8.29 \cdot 10^{-2}$  | 0.16/0.50                           | 0.5–100.0                               |
| Kaempferol 3-O-Glc-7-O-Rha        | P                       | +20                     | 1.5787                           | -0.3641        | 0.9981 | $6.48 \cdot 10^{-2}$  | 0.14/0.41                           | 0.5–100.0                               |
| Kaempferol 3,7-di-O-Glc           | P                       | +20                     | 1.4196                           | -0.4514        | 0.9989 | $5.76 \cdot 10^{-2}$  | 0.14/0.41                           | 0.5–100.0                               |
| Quercitrin                        | P                       | +20                     | 1.8267                           | -0.4160        | 0.9990 | $11.73 \cdot 10^{-2}$ | 0.21/0.64                           | 0.7–100.0                               |
| Isoquercitrin                     | P                       | +20                     | 1.6705                           | -0.4374        | 0.9988 | $12.79 \cdot 10^{-2}$ | 0.25/0.77                           | 0.8–100.0                               |
| Quercetin 3-O-Glc-7-O-Rha         | P                       | +20                     | 1.4041                           | -0.3270        | 0.9992 | $14.02 \cdot 10^{-2}$ | 0.33/1.00                           | 1.0–100.0                               |
| Quercetin 3,7-di-O-Glc            | P                       | +20                     | 1.3436                           | -0.4406        | 0.9981 | $17.58 \cdot 10^{-2}$ | 0.43/1.31                           | 1.4–100.0                               |
| Rhodiocyanin                      | P                       | +35                     | 1.5742                           | -0.7787        | 0.9972 | $14.95 \cdot 10^{-2}$ | 0.31/0.95                           | 1.0–100.0                               |
| Herbacin                          | P                       | +20                     | 1.4663                           | -0.6790        | 0.9975 | $15.01 \cdot 10^{-2}$ | 0.34/1.02                           | 1.1–100.0                               |
| Rhodiocyanin                      | P                       | +30                     | 1.2750                           | -0.7542        | 0.9978 | $15.82 \cdot 10^{-2}$ | 0.41/1.24                           | 1.3–100.0                               |
| Gossypin                          | P                       | +20                     | 1.1880                           | -0.8182        | 0.9967 | $15.23 \cdot 10^{-2}$ | 0.43/1.29                           | 1.3–100.0                               |
| Hibifolin                         | P                       | +40                     | 1.1037                           | -0.4687        | 0.9962 | $15.78 \cdot 10^{-2}$ | 0.47/1.43                           | 1.5–100.0                               |
| 5-O-Feruloylquinic acid           | N                       | -20                     | 1.8535                           | 0.0761         | 0.9989 | $4.55 \cdot 10^{-2}$  | 0.08/0.25                           | 0.3–100.0                               |

<sup>a</sup> Ionization mode : N—negative; P—positive. <sup>b</sup> CE—collision energy. <sup>c</sup> Regression equation:  $y = a \cdot x + b$ .

**Table S3.** Regression equations, correlation coefficients ( $r^2$ ), standard deviation ( $S_{yx}$ ), limits of detection (LOD), limits of quantification (LOQ) and linear ranges for 13 reference standards used in HPLC-DAD quantification.

| Compound                                   | Regression equation <sup>a</sup> |         | $r^2$  | $S_{yx}$             | LOD/<br>LOQ<br>( $\mu\text{g/mL}$ ) | Linear<br>range<br>( $\mu\text{g/mL}$ ) |
|--------------------------------------------|----------------------------------|---------|--------|----------------------|-------------------------------------|-----------------------------------------|
|                                            | $a$                              | $b$     |        |                      |                                     |                                         |
| 1,6-Di- <i>O</i> -galloyl glucose          | 0.0783                           | -0.0217 | 0.9991 | $2.40 \cdot 10^{-2}$ | 1.01/3.06                           | 3.5–100.0                               |
| 1,2,3,4,6-Penta- <i>O</i> -galloyl glucose | 0.1064                           | -0.0121 | 0.9993 | $1.88 \cdot 10^{-2}$ | 0.58/1.77                           | 2.0–100.0                               |
| (-)-Epicatechin                            | 0.1138                           | -0.0255 | 0.9981 | $2.96 \cdot 10^{-2}$ | 0.86/2.60                           | 3.0–100.0                               |
| (-)-Epicatechin gallate                    | 0.1465                           | -0.0336 | 0.9985 | $2.67 \cdot 10^{-2}$ | 0.60/1.82                           | 2.0–100.0                               |
| (+)-Gallocatechin gallate                  | 0.1217                           | -0.0155 | 0.9987 | $3.48 \cdot 10^{-2}$ | 0.94/2.86                           | 3.0–100.0                               |
| (-)-Epigallocatechin gallate               | 0.1740                           | -0.0177 | 0.9982 | $3.28 \cdot 10^{-2}$ | 0.62/1.89                           | 2.0–100.0                               |
| Procyanidin B <sub>1</sub>                 | 0.1716                           | -0.0109 | 0.9990 | $2.50 \cdot 10^{-2}$ | 0.48/1.46                           | 1.5–100.0                               |
| Arbutin                                    | 0.0040                           | -0.0017 | 0.9972 | $0.41 \cdot 10^{-2}$ | 2.31/7.00                           | 7.0–100.0                               |
| Salidroside                                | 0.0148                           | -0.0146 | 0.9974 | $0.62 \cdot 10^{-2}$ | 1.38/4.19                           | 4.5–100.0                               |
| Rosavin                                    | 0.0483                           | -0.0105 | 0.9978 | $0.82 \cdot 10^{-2}$ | 0.56/1.70                           | 2.0–100.0                               |
| Rosarin                                    | 0.0493                           | -0.0090 | 0.9974 | $0.75 \cdot 10^{-2}$ | 0.50/1.52                           | 2.0–100.0                               |
| Rosin                                      | 0.0642                           | -0.0080 | 0.9976 | $0.91 \cdot 10^{-2}$ | 0.47/1.42                           | 2.0–100.0                               |
| Herbacin                                   | 0.0636                           | -0.0114 | 0.9985 | $1.21 \cdot 10^{-2}$ | 0.63/1.90                           | 2.0–100.0                               |

<sup>b</sup> Regression equation:  $y = a \cdot x + b$ .

Table S4. Retention times ( $t_R$ ), UV- and ESI-MS spectral data of compounds 1–146 found in *R. rosea*.

| No                         | $t_R$ , min <sup>a</sup> | Compound <sup>b</sup>                                    | UV pattern <sup>c</sup> | CE (eV) <sup>d</sup> | ESI-MS, $m/z$   |                                                                                                                                         |
|----------------------------|--------------------------|----------------------------------------------------------|-------------------------|----------------------|-----------------|-----------------------------------------------------------------------------------------------------------------------------------------|
|                            |                          |                                                          |                         |                      | MS <sup>e</sup> | MS/MS (I, %) <sup>f</sup>                                                                                                               |
| <b>Negative ionization</b> |                          |                                                          |                         |                      |                 |                                                                                                                                         |
| 1                          | 1.91 <sup>i</sup>        | 1-O-Galloyl glucose <sup>s</sup>                         | GA                      | -20                  | 331             | [331]: 169 (100), 125 (19)                                                                                                              |
| 2                          | 2.18 <sup>i</sup>        | O-Galloyl glucose <sup>L</sup>                           | GA                      | -20                  | 331             | [331]: 169 (100), 125 (26)                                                                                                              |
| 3                          | 2.33 <sup>i</sup>        | O-Galloyl glucose <sup>L</sup>                           | GA                      | -20                  | 331             | [331]: 169 (100), 125 (9)                                                                                                               |
| 4                          | 2.57 <sup>i</sup>        | O-Galloyl glucose <sup>L</sup>                           | GA                      | -20                  | 331             | [331]: 169 (100), 125 (24)                                                                                                              |
| 5                          | 2.94 <sup>i</sup>        | Gallic acid <sup>s</sup>                                 | GA                      | -20                  | 169             | [169]: 125 (100)                                                                                                                        |
| 6                          | 4.61 <sup>i</sup>        | Di-O-galloyl glucose <sup>L</sup>                        | GA                      | -20                  | 483             | [483]: 331 (42), 169 (100), 125 (6)                                                                                                     |
| 7                          | 4.78 <sup>i</sup>        | 1,6-Di-O-galloyl glucose <sup>s</sup>                    | GA                      | -20                  | 483             | [483]: 331 (53), 169 (100), 125 (10)                                                                                                    |
| 8                          | 5.11 <sup>i</sup>        | Procyanidin dimer (EGC-EGC) <sup>L</sup>                 | PC                      | -20                  | 609             | [609]: 305 (100)                                                                                                                        |
| 9                          | 5.27 <sup>i</sup>        | Gallocatechin <sup>s</sup>                               | CT                      | -35                  | 305             | [305]: 168 (37), 125 (100)                                                                                                              |
| 10                         | 5.52 <sup>i</sup>        | Epigallocatechin <sup>s</sup>                            | CT                      | -35                  | 305             | [305]: 168 (62), 125 (100)                                                                                                              |
| 11                         | 5.76 <sup>i</sup>        | Procyanidin dimer (EGC-EGCG) <sup>L</sup>                | PC                      | -20                  | 761             | [761]: 457 (82), 305 (100)                                                                                                              |
| 12                         | 5.85 <sup>i</sup>        | Catechin <sup>s</sup>                                    | CT                      | -35                  | 289             | [289]: 247 (100), 191 (32), 123 (11)                                                                                                    |
| 13                         | 6.27 <sup>i</sup>        | Tri-O-galloyl glucose <sup>L</sup>                       | GA                      | -25                  | 635             | [635]: 483 (63), 331 (100)<br>[483]: 331 (37), 169 (100), 125 (29)                                                                      |
| 14                         | 6.31 <sup>i</sup>        | Procyanidin dimer (EGCG-EGCG) <sup>L</sup>               | PC                      | -20                  | 913             | [913]: 457 (100)                                                                                                                        |
| 15                         | 6.35 <sup>i</sup>        | Procyanidin trimer (EGC-EGC-EGC) <sup>L</sup>            | PC                      | -22                  | 913             | [913]: 609 (45), 305 (100)                                                                                                              |
| 16                         | 6.48 <sup>i</sup>        | Procyanidin trimer (EGC-EGC-EGCG) <sup>L</sup>           | PC                      | -22                  | 1065            | [1065]: 761 (31), 609 (100), 457 (18)<br>[609]: 457 (32), 305 (100)                                                                     |
| 17                         | 6.54 <sup>i</sup>        | 1,3,6-Tri-O-galloyl glucose <sup>s</sup>                 | GA                      | -25                  | 635             | [635]: 483 (54), 331 (100)<br>[483]: 331 (42), 169 (100), 125 (11)                                                                      |
| 18                         | 6.78 <sup>i</sup>        | Tri-O-galloyl glucose <sup>L</sup>                       | GA                      | -25                  | 635             | [635]: 483 (45), 331 (100)<br>[483]: 331 (31), 169 (100), 125 (16)                                                                      |
| 19                         | 6.82 <sup>i</sup>        | Procyanidin trimer (EGC-EGCG-EGCG) <sup>L</sup>          | PC                      | -22                  | 1217            | [1217]: 913 (27), 761 (100), 457 (9)<br>[761]: 457 (100), 305 (63)                                                                      |
| 20                         | 6.89 <sup>i</sup>        | Procyanidin trimer (EGCG-EGCG-EGCG) <sup>L</sup>         | PC                      | -22                  | 1369            | [1369]: 913 (23), 457 (100)                                                                                                             |
| 21                         | 6.92 <sup>i</sup>        | Procyanidin tetramer (EGC-EGC-EGC-EGCG) <sup>L</sup>     | PC                      | -22                  | 1369            | [1369]: 1065 (14), 913 (22), 761 (100), 609 (5)<br>[761]: 609 (38), 457 (22), 305 (100)                                                 |
| 22                         | 7.02 <sup>i</sup>        | Epicatechin <sup>s</sup>                                 | CT                      | -35                  | 289             | [289]: 247 (25), 191 (64), 123 (100)                                                                                                    |
| 23                         | 7.12 <sup>i</sup>        | Epigallocatechin gallate <sup>s</sup>                    | CT                      | -35                  | 457             | [457]: 305 (32), 168 (67), 125 (100)                                                                                                    |
| 24                         | 7.22 <sup>i</sup>        | Gallocatechin gallate <sup>s</sup>                       | CT                      | -35                  | 457             | [457]: 305 (11), 168 (51), 125 (100)                                                                                                    |
| 25                         | 7.41 <sup>i</sup>        | Procyanidin tetramer (EGC-EGC-EGCG-EGCG) <sup>L</sup>    | PC                      | -22                  | 1521            | [1521]: 1217 (2), 913 (11), 761 (100)<br>[761]: 457 (42), 305 (100)                                                                     |
| 26                         | 7.53 <sup>i</sup>        | Procyanidin tetramer (EGC-EGCG-EGCG-EGCG) <sup>L</sup>   | PC                      | -22                  | 1673            | [1673]: 1369 (4), 1217 (2), 913 (100), 761 (5)<br>[913]: 761 (25), 457 (100), 305 (28)                                                  |
| 27                         | 7.55 <sup>i</sup>        | Tetra-O-galloyl glucose <sup>L</sup>                     | GA                      | -25                  | 787             | [787]: 635 (82), 483 (100), 331 (41)<br>[635]: 483 (67), 331 (100), 169 (59)                                                            |
| 28                         | 7.63 <sup>i</sup>        | 1,2,3,6-Tetra-O-galloyl glucose <sup>s</sup>             | GA                      | -25                  | 787             | [787]: 635 (53), 483 (100), 331 (45)<br>[635]: 483 (54), 331 (100), 169 (39), 125 (8)                                                   |
| 29                         | 7.83 <sup>i</sup>        | Tetra-O-galloyl glucose <sup>L</sup>                     | GA                      | -25                  | 787             | [787]: 635 (71), 483 (100), 331 (36)<br>[635]: 483 (52), 331 (100), 169 (27)                                                            |
| 30                         | 8.07 <sup>i</sup>        | Epicatechin gallate <sup>s</sup>                         | CT                      | -35                  | 441             | [441]: 289 (12), 125 (43), 109 (100)                                                                                                    |
| 31                         | 8.14 <sup>i</sup>        | Tetra-O-galloyl glucose <sup>L</sup>                     | GA                      | -25                  | 787             | [787]: 635 (62), 483 (100), 331 (42)<br>[635]: 483 (42), 331 (100), 169 (49)                                                            |
| 32                         | 8.26 <sup>i</sup>        | Penta-O-galloyl glucose <sup>L</sup>                     | GA                      | -25                  | 939             | [939]: 787 (52), 635 (100), 483 (19)<br>[635]: 483 (12), 331 (56), 169 (100)                                                            |
| 33                         | 8.42 <sup>i</sup>        | 1,2,3,4,6-Penta-O-galloyl glucose <sup>s</sup>           | GA                      | -25                  | 939             | [939]: 787 (46), 635 (100), 483 (28)<br>[635]: 483 (10), 331 (43), 169 (100)                                                            |
| 34                         | 8.63 <sup>i</sup>        | Hexa-O-galloyl glucose <sup>L</sup>                      | GA                      | -30                  | 1091            | [1091]: 939 (78), 787 (66), 635 (54), 483 (100)<br>[483]: 331 (57), 169 (100)                                                           |
| 35                         | 8.72 <sup>i</sup>        | Hexa-O-galloyl glucose <sup>L</sup>                      | GA                      | -30                  | 1091            | [1091]: 939 (72), 787 (59), 635 (48), 483 (100)<br>[483]: 331 (41), 169 (100)                                                           |
| 36                         | 8.92 <sup>i</sup>        | Catechin gallate <sup>s</sup>                            | CT                      | -35                  | 441             | [441]: 289 (32), 125 (53), 109 (100)                                                                                                    |
| 37                         | 8.98 <sup>i</sup>        | Hepta-O-galloyl glucose <sup>L</sup>                     | GA                      | -30                  | 1243            | [1243]: 1091 (6), 939 (38), 787 (100), 635 (11)<br>[787]: 635 (10), 483 (41), 331 (100), 169 (25)                                       |
| 38                         | 9.14 <sup>i</sup>        | Hepta-O-galloyl glucose <sup>L</sup>                     | GA                      | -30                  | 1243            | [1243]: 1091 (9), 939 (45), 787 (100), 635 (18)<br>[787]: 635 (12), 483 (46), 331 (100), 169 (31)                                       |
| 39                         | 9.63 <sup>i</sup>        | Octa-O-galloyl glucose <sup>L</sup>                      | GA                      | -30                  | 1395            | [1395]: 1243 (4), 1091 (9), 939 (100), 787 (34)<br>[939]: 787 (4), 635 (25), 483 (100), 331 (4)<br>[483]: 331 (25), 169 (100), 125 (11) |
| 40                         | 9.87 <sup>i</sup>        | Octa-O-galloyl glucose <sup>L</sup>                      | GA                      | -30                  | 1395            | [1395]: 1243 (8), 1091 (9), 939 (100), 787 (21)<br>[939]: 787 (3), 635 (18), 483 (100), 331 (6)<br>[483]: 331 (11), 169 (100), 125 (15) |
| 41                         | 10.04 <sup>i</sup>       | Procyanidin tetramer (EGCG-EGCG-EGCG-EGCG) <sup>L</sup>  | PC                      | -25                  | 1825            | [1825]: 1369 (7), 913 (22), 457 (100)                                                                                                   |
| 42                         | 10.41 <sup>i</sup>       | Procyanidin pentamer (EGC-EGC-EGC-EGC-EGCG) <sup>L</sup> | PC                      | -25                  | 1673            | [1673]: 1369 (2), 1217 (2), 1065 (27), 913 (100), 761 (5); [913]: 761 (18), 609 (100)<br>[609]: 457 (26), 305 (100)                     |

Table S4. Cont.

| No                         | $t_R$ , min <sup>a</sup> | Compound <sup>b</sup>                                                              | UV pattern <sup>c</sup> | CE (eV) <sup>d</sup> | ESI-MS, $m/z$   |                                                                                                                |
|----------------------------|--------------------------|------------------------------------------------------------------------------------|-------------------------|----------------------|-----------------|----------------------------------------------------------------------------------------------------------------|
|                            |                          |                                                                                    |                         |                      | MS <sup>e</sup> | MS <sup>(m)</sup> (I, %) <sup>f</sup>                                                                          |
| 43                         | 11.18 <sup>i</sup>       | Procyanidin pentamer (EGC-EGC-EGCG-EGCG-EGCG) <sup>L</sup>                         | PC                      | -25                  | 1825            | [1825]: 1521 (1), 1369 (3), 1217 (26), 1065 (100), 913 (11)<br>[1065]: 913 (36), 761 (100), 457 (30), 305 (14) |
| 44                         | 11.43 <sup>i</sup>       | Procyanidin pentamer (EGC-EGC-EGCG-EGCG-EGCG) <sup>L</sup>                         | PC                      | -25                  | 1977            | [1977]: 1673 (1), 1521 (1), 1369 (10), 1065 (15), 913 (100)<br>[913]: 609 (37), 457 (100), 305 (26)            |
| 45                         | 1.90 <sup>ii</sup>       | Hydroquinone <i>O</i> -Hex- <i>O</i> -Pent <sup>L</sup>                            | HQ                      | -35                  | 403             | [403]: 271 (33), 109 (100)                                                                                     |
| 46                         | 1.98 <sup>ii</sup>       | Hydroquinone <i>O</i> -Glc (=arbutin) <sup>S</sup>                                 | HQ                      | -35                  | 271             | [271]: 109 (100)                                                                                               |
| 47                         | 2.09 <sup>ii</sup>       | Tyrosol <i>O</i> -Hex- <i>O</i> -Pent <sup>L</sup>                                 | TY                      | -17                  | 431             | [431]: 299 (27), 137 (100), 119 (9)                                                                            |
| 48                         | 2.37 <sup>ii</sup>       | Tyrosol <i>O</i> -Glc (=salidroside) <sup>S</sup>                                  | TY                      | -15                  | 299             | [299]: 137 (100), 119 (31), 89 (34)                                                                            |
| 49                         | 4.59 <sup>ii</sup>       | Tyrosol <i>O</i> -dHex <sup>L</sup>                                                | TY                      | -15                  | 283             | [283]: 137 (100), 119 (27), 89 (21)                                                                            |
| 50                         | 4.95 <sup>ii</sup>       | Tyrosol (=p-hydroxyphenethyl alcohol) <sup>S</sup>                                 | TY                      | -15                  | 137             | [137]: 119 (82), 89 (100)                                                                                      |
| 51                         | 5.11 <sup>ii</sup>       | Benzyl alcohol <i>O</i> -Hex- <i>O</i> -Pent <sup>L</sup>                          | BZ                      | -18                  | 401             | [401]: 269 (25), 107 (100), 77 (38)                                                                            |
| 52                         | 5.23 <sup>ii</sup>       | Benzyl alcohol <i>O</i> -Hex- <i>O</i> -Pent <sup>L</sup>                          | BZ                      | -18                  | 401             | [401]: 269 (34), 107 (100), 77 (21)                                                                            |
| 53                         | 5.56 <sup>ii</sup>       | Benzyl alcohol <i>O</i> -Hex <sup>L</sup>                                          | BZ                      | -18                  | 269             | [269]: 107 (100), 77 (52)                                                                                      |
| 54                         | 5.82 <sup>ii</sup>       | <i>p</i> -Hydroxycinnamyl alcohol <i>O</i> -Hex- <i>O</i> -Pent <sup>L</sup>       | pHCA                    | -28                  | 443             | [443]: 311 (14), 149 (100), 131 (9)                                                                            |
| 55                         | 6.02 <sup>ii</sup>       | <i>p</i> -Hydroxycinnamyl alcohol <i>O</i> -Glc (=triandrin) <sup>S</sup>          | pHCA                    | -28                  | 311             | [311]: 149 (100), 131 (54)                                                                                     |
| 56                         | 6.27 <sup>ii</sup>       | Benzyl alcohol <sup>S</sup>                                                        | BZ                      | -18                  | 107             | [107]: 77 (100)                                                                                                |
| 57                         | 6.55 <sup>ii</sup>       | Rhodiocyanoside A/D <i>O</i> -Pent <sup>L</sup>                                    | HNG                     | -25                  | 390             | [390]: 258 (41), 96 (100)                                                                                      |
| 58                         | 6.76 <sup>ii</sup>       | Rhodiocyanoside D <sup>L</sup>                                                     | HNG                     | -25                  | 258             | [258]: 96 (100)                                                                                                |
| 59                         | 6.97 <sup>ii</sup>       | Rhodiocyanoside A <sup>S</sup>                                                     | HNG                     | -25                  | 258             | [258]: 96 (100)                                                                                                |
| 60                         | 7.18 <sup>ii</sup>       | Rosiridol di- <i>O</i> -Hex- <i>O</i> -Pent <sup>L</sup>                           | NA                      | -22                  | 625             | [625]: 493 (11), 331 (22), 169 (100)                                                                           |
| 61                         | 7.27 <sup>ii</sup>       | Rosiridol <i>O</i> -Hex-di- <i>O</i> -Pent <sup>L</sup>                            | NA                      | -22                  | 595             | [595]: 463 (9), 331 (15), 169 (100)                                                                            |
| 62                         | 7.47 <sup>ii</sup>       | Rosiridol <i>O</i> -Hex-di- <i>O</i> -Pent <sup>L</sup>                            | NA                      | -22                  | 595             | [595]: 463 (11), 331 (18), 169 (100)                                                                           |
| 63                         | 7.52 <sup>ii</sup>       | Rosiridol <i>O</i> -Hex- <i>O</i> -Pent <sup>L</sup>                               | NA                      | -22                  | 463             | [463]: 331 (21), 169 (100)                                                                                     |
| 64                         | 7.81 <sup>ii</sup>       | Rosiridol <i>O</i> -Hex- <i>O</i> -Pent <sup>L</sup>                               | NA                      | -22                  | 463             | [463]: 331 (24), 169 (100)                                                                                     |
| 65                         | 8.18 <sup>ii</sup>       | Tyrosol <i>O</i> -Hex- <i>O</i> -Ac <sup>L</sup>                                   | TY                      | -20                  | 341             | [341]: 299 (8), 137 (100), 119 (24)                                                                            |
| 66                         | 8.72 <sup>ii</sup>       | Tyrosol <i>O</i> -Hex- <i>O</i> -Ac <sup>L</sup>                                   | TY                      | -20                  | 341             | [341]: 299 (5), 137 (100), 119 (11)                                                                            |
| 67                         | 8.98 <sup>ii</sup>       | Tyrosol <i>O</i> -Hex-di- <i>O</i> -Ac <sup>L</sup>                                | TY                      | -20                  | 383             | [383]: 299 (34), 137 (100), 119 (5)                                                                            |
| 68                         | 9.02 <sup>ii</sup>       | Cinnamyl alcohol <i>O</i> -Hex-di- <i>O</i> -Pent <sup>L</sup>                     | CIN                     | -20                  | 559             | [559]: 427 (8), 295 (14), 133 (100)                                                                            |
| 69                         | 9.26 <sup>ii</sup>       | Cinnamyl alcohol <i>O</i> -Hex-di- <i>O</i> -Pent <sup>L</sup>                     | CIN                     | -20                  | 559             | [559]: 427 (11), 295 (27), 133 (100)                                                                           |
| 70                         | 9.57 <sup>ii</sup>       | Cinnamyl alcohol <i>O</i> -(6'- <i>O</i> -Araf)-Glc (=rosarin) <sup>S</sup>        | CIN                     | -20                  | 427             | [427]: 295 (18), 133 (100)                                                                                     |
| 71                         | 9.95 <sup>ii</sup>       | Cinnamyl alcohol <i>O</i> -(6'- <i>O</i> -Arap)-Glc (=rosavin) <sup>S</sup>        | CIN                     | -20                  | 427             | [427]: 295 (37), 133 (100)                                                                                     |
| 72                         | 10.26 <sup>ii</sup>      | Cinnamyl alcohol <i>O</i> -Hex- <i>O</i> -Pent <sup>L</sup>                        | CIN                     | -20                  | 427             | [427]: 295 (22), 133 (100)                                                                                     |
| 73                         | 10.51 <sup>ii</sup>      | Cinnamyl alcohol <i>O</i> -Glc (=rosin) <sup>S</sup>                               | CIN                     | -20                  | 295             | [295]: 133 (100)                                                                                               |
| 74                         | 10.98 <sup>ii</sup>      | Rosiridol 1- <i>O</i> -Glc (=rosiridin) <sup>S</sup>                               | NA                      | -22                  | 331             | [331]: 169 (100)                                                                                               |
| 75                         | 11.27 <sup>ii</sup>      | <i>p</i> -Hydroxycinnamyl alcohol <i>O</i> -Hex- <i>O</i> -Ac <sup>L</sup>         | pHCA                    | -30                  | 353             | [353]: 311 (32), 149 (100), 131 (5)                                                                            |
| 76                         | 11.67 <sup>ii</sup>      | <i>p</i> -Hydroxycinnamyl alcohol <i>O</i> -Hex- <i>O</i> -Ac <sup>L</sup>         | pHCA                    | -30                  | 353             | [353]: 311 (28), 149 (100), 131 (7)                                                                            |
| 77                         | 12.14 <sup>ii</sup>      | Rosiridol <i>O</i> -Hex- <i>O</i> -Ac <sup>L</sup>                                 | NA                      | -25                  | 373             | [373]: 331 (7), 169 (100)                                                                                      |
| 78                         | 12.48 <sup>ii</sup>      | Rosiridol <i>O</i> -Hex-di- <i>O</i> -Ac <sup>L</sup>                              | NA                      | -25                  | 415             | [415]: 331 (26), 169 (100)                                                                                     |
| 79                         | 12.81 <sup>ii</sup>      | Rosiridol <i>O</i> -Hex-di- <i>O</i> -Ac <sup>L</sup>                              | NA                      | -25                  | 415             | [415]: 331 (34), 169 (100)                                                                                     |
| 80                         | 13.65 <sup>ii</sup>      | <i>p</i> -Methoxycinnamyl alcohol <i>O</i> -Hex- <i>O</i> -Pent <sup>L</sup>       | pMCA                    | -35                  | 457             | [457]: 325 (21), 163 (100), 149 (9)                                                                            |
| 81                         | 13.94 <sup>ii</sup>      | <i>p</i> -Methoxycinnamyl alcohol <i>O</i> -Hex- <i>O</i> -Pent <sup>L</sup>       | pMCA                    | -35                  | 457             | [457]: 325 (27), 163 (100), 149 (6)                                                                            |
| 82                         | 14.57 <sup>ii</sup>      | <i>p</i> -Methoxycinnamyl alcohol <i>O</i> -Glc (=vimalin) <sup>S</sup>            | pMCA                    | -35                  | 325             | [325]: 163 (100), 149 (10)                                                                                     |
| 83                         | 15.06 <sup>ii</sup>      | Cinnamyl alcohol <sup>S</sup>                                                      | CIN                     | -20                  | 133             |                                                                                                                |
| 84                         | 15.47 <sup>ii</sup>      | Cinnamic acid <sup>S</sup>                                                         | CAc                     | -20                  | 147             |                                                                                                                |
| 85                         | 16.58 <sup>ii</sup>      | <i>p</i> -Methoxycinnamyl alcohol <sup>S</sup>                                     | pMCA                    | -35                  | 163             | [163]: 149 (100)                                                                                               |
| 128                        | 7.27 <sup>iv</sup>       | 3- <i>O</i> -Feruloylquinic acid                                                   | FQA                     | -20                  | 367             | [367]: 193 (100), 173 (5), 149 (2)                                                                             |
| <b>Positive ionization</b> |                          |                                                                                    |                         |                      |                 |                                                                                                                |
| 86                         | 5.02 <sup>iii</sup>      | Kaempferol tri- <i>O</i> -Hex- <i>O</i> -dHex <sup>L</sup>                         | K37                     | +20                  | 919             | [919]: 757 (23), 595 (100), 433 (31)<br>[595]: 433 (100), 287 (21)                                             |
| 87                         | 5.41 <sup>iii</sup>      | Herbacetin tri- <i>O</i> -Hex- <i>O</i> -dHex <sup>L</sup>                         | H78                     | +20                  | 935             | [935]: 773 (11), 611 (100), 449 (27)<br>[611]: 449 (100), 303 (27)                                             |
| 88                         | 5.56 <sup>iii</sup>      | Gossypetin di- <i>O</i> -Hex- <i>O</i> -dHex <sup>L</sup>                          | G78                     | +20                  | 789             | [789]: 627 (32), 465 (100), 319 (17)                                                                           |
| 89                         | 5.63 <sup>iii</sup>      | Quercetin di- <i>O</i> -Hex- <i>O</i> -dHex <sup>L</sup>                           | Q37                     | +20                  | 773             | [773]: 611 (15), 449 (100), 303 (12)                                                                           |
| 90                         | 5.97 <sup>iii</sup>      | Kaempferol di- <i>O</i> -Hex- <i>O</i> -dHex <sup>L</sup>                          | K37                     | +20                  | 757             | [757]: 595 (18), 433 (100), 287 (28)                                                                           |
| 91                         | 6.18 <sup>iii</sup>      | Gossypetin di- <i>O</i> -Hex <sup>L</sup>                                          | G8                      | +20                  | 643             | [643]: 481 (15), 319 (100)                                                                                     |
| 92                         | 6.21 <sup>iii</sup>      | Herbacetin di- <i>O</i> -Hex- <i>O</i> -dHex <sup>L</sup>                          | H78                     | +20                  | 773             | [773]: 611 (38), 449 (100), 303 (8)                                                                            |
| 93                         | 6.32 <sup>iii</sup>      | Gossypetin di- <i>O</i> -Hex <sup>L</sup>                                          | G38                     | +20                  | 643             | [643]: 481 (18), 319 (100)                                                                                     |
| 94                         | 6.43 <sup>iii</sup>      | Gossypetin 7- <i>O</i> -(3''- <i>O</i> -Glc)-Rha (=rhodiolfavonoside) <sup>S</sup> | G7                      | +20                  | 627             | [627]: 465 (100), 319 (15)                                                                                     |
| 95                         | 6.63 <sup>iii</sup>      | Herbacetin 7- <i>O</i> -(3''- <i>O</i> -Glc)-Rha (=rhodiosin) <sup>S</sup>         | H7                      | +20                  | 611             | [611]: 449 (100), 303 (21)                                                                                     |
| 96                         | 6.82 <sup>iii</sup>      | Gossypetin 7- <i>O</i> -Rha-8- <i>O</i> -Glc (=rhodioldigin) <sup>S</sup>          | G78                     | +20                  | 627             | [627]: 465 (100), 319 (52)                                                                                     |
| 97                         | 7.02 <sup>iii</sup>      | Kaempferol <i>O</i> -Hex- <i>O</i> -dHex <sup>L</sup>                              | K7                      | +20                  | 595             | [595]: 433 (100), 287 (31)                                                                                     |
| 98                         | 7.21 <sup>iii</sup>      | Herbacetin-8- <i>O</i> -Xyl (=rhodalinal) <sup>S</sup>                             | H8                      | +20                  | 435             | [435]: 303 (100)                                                                                               |
| 99                         | 7.35 <sup>iii</sup>      | Herbacetin 7- <i>O</i> -Rha-8- <i>O</i> -Glc (=rhodionidin) <sup>S</sup>           | H78                     | +20                  | 611             | [611]: 449 (100), 303 (41)                                                                                     |
| 100                        | 7.43 <sup>iii</sup>      | Quercetin 3,7-di- <i>O</i> -Glc <sup>S</sup>                                       | Q37                     | +20                  | 627             | [627]: 465 (57), 303 (100)                                                                                     |
| 101                        | 7.54 <sup>iii</sup>      | Kaempferol 3,7-di- <i>O</i> -Glc <sup>S</sup>                                      | K37                     | +20                  | 611             | [611]: 449 (38), 287 (100)                                                                                     |

Table S4. Cont.

| No  | <i>t<sub>R</sub></i> , min <sup>a</sup> | Compound <sup>b</sup>                                                                            | UV pattern <sup>c</sup> | CE (eV) <sup>d</sup> | ESI-MS, <i>m/z</i> |                                                |
|-----|-----------------------------------------|--------------------------------------------------------------------------------------------------|-------------------------|----------------------|--------------------|------------------------------------------------|
|     |                                         |                                                                                                  |                         |                      | MS <sup>e</sup>    | MS <sup>(m)</sup> (I, %) <sup>f</sup>          |
| 102 | 7.75 <sup>iii</sup>                     | Quercetin 3- <i>O</i> -Glc-7- <i>O</i> -Rha <sup>s</sup>                                         | Q37                     | +20                  | 611                | [611]: 449 (100), 303 (31)                     |
| 103 | 7.97 <sup>iii</sup>                     | Kaempferol 3- <i>O</i> -Glc-7- <i>O</i> -Rha <sup>s</sup>                                        | K37                     | +20                  | 595                | [595]: 433 (100), 287 (22)                     |
| 104 | 8.01 <sup>iii</sup>                     | Gossypetin 8- <i>O</i> -Glc (=gossypin) <sup>s</sup>                                             | G8                      | +20                  | 481                | [481]: 319 (100)                               |
| 105 | 8.11 <sup>iii</sup>                     | Kaempferol 3,7-di- <i>O</i> -Rha (=kaempferitrin) <sup>s</sup>                                   | K37                     | +35                  | 579                | [579]: 433 (100), 287 (15)                     |
| 106 | 8.41 <sup>iii</sup>                     | Gossypetin 7- <i>O</i> -Rha (=rhodioglin) <sup>s</sup>                                           | G7                      | +30                  | 465                | [465]: 319 (100)                               |
| 107 | 8.57 <sup>iii</sup>                     | Quercetin 3- <i>O</i> -Glc (=isoquercitrin) <sup>s</sup>                                         | Q3                      | +20                  | 465                | [465]: 303 (100)                               |
| 108 | 8.98 <sup>iii</sup>                     | Quercetin 3- <i>O</i> -Rha (=quercitrin) <sup>s</sup>                                            | Q3                      | +20                  | 449                | [449]: 303 (100)                               |
| 109 | 9.22 <sup>iii</sup>                     | Herbacetin 8- <i>O</i> -Glc (=alginin) <sup>s</sup>                                              | H8                      | +20                  | 465                | [465]: 303 (100)                               |
| 110 | 9.43 <sup>iii</sup>                     | Herbacetin <i>O</i> -dHex <sup>L</sup>                                                           | H8                      | +20                  | 449                | [449]: 303 (100)                               |
| 111 | 10.12 <sup>iii</sup>                    | Kaempferol 3- <i>O</i> -Rha (=afzelin) <sup>s</sup>                                              | K3                      | +30                  | 433                | [433]: 287 (100)                               |
| 112 | 10.46 <sup>iii</sup>                    | Herbacetin 7- <i>O</i> -Rha (=rhodionin) <sup>s</sup>                                            | H7                      | +35                  | 449                | [449]: 303 (100)                               |
| 113 | 11.27 <sup>iii</sup>                    | Herbacetin <i>O</i> -dHex <sup>L</sup>                                                           | H3                      | +20                  | 449                | [449]: 303 (100)                               |
| 114 | 11.45 <sup>iii</sup>                    | Kaempferol 7- <i>O</i> -Rha                                                                      | K7                      | +35                  | 433                | [433]: 287 (100)                               |
| 115 | 1.97 <sup>iv</sup>                      | Hibiscetin di- <i>O</i> -Hex- <i>O</i> -HexA <sup>L</sup>                                        | Hi38                    | +35                  | 835                | [835]: 673 (18), 511 (100), 335 (22)           |
| 116 | 2.58 <sup>iv</sup>                      | Gossypetin di- <i>O</i> -Hex- <i>O</i> -HexA <sup>L</sup>                                        | G378                    | +35                  | 819                | [819]: 657 (90), 495 (100), 319 (29)           |
| 117 | 2.82 <sup>iv</sup>                      | Gossypetin <i>O</i> -Ac-di- <i>O</i> -Hex- <i>O</i> -HexA <sup>L</sup>                           | G378                    | +35                  | 861                | [861]: 819 (5), 657 (29), 495 (100), 319 (16)  |
| 118 | 3.15 <sup>iv</sup>                      | Gossypetin <i>O</i> -Ac-di- <i>O</i> -Hex- <i>O</i> -HexA <sup>L</sup>                           | G378                    | +35                  | 861                | [861]: 819 (3), 657 (22), 495 (100), 319 (27)  |
| 119 | 4.42 <sup>iv</sup>                      | Herbacetin di- <i>O</i> -Hex- <i>O</i> -HexA <sup>L</sup>                                        | H38                     | +35                  | 803                | [803]: 641 (74), 479 (100), 303 (14)           |
| 120 | 4.63 <sup>iv</sup>                      | Herbacetin di- <i>O</i> -Hex- <i>O</i> -HexA <sup>L</sup>                                        | H378                    | +35                  | 803                | [803]: 641 (84), 479 (100), 303 (10)           |
| 121 | 5.02 <sup>iv</sup>                      | Herbacetin <i>O</i> -Mal-di- <i>O</i> -Hex- <i>O</i> -HexA <sup>L</sup>                          | H378                    | +35                  | 889                | [889]: 803 (25), 641 (37), 479 (100), 303 (29) |
| 122 | 5.27 <sup>iv</sup>                      | Herbacetin <i>O</i> -Ac-di- <i>O</i> -Hex- <i>O</i> -HexA <sup>L</sup>                           | H378                    | +35                  | 845                | [845]: 803 (27), 641 (31), 479 (100), 303 (21) |
| 123 | 5.52 <sup>iv</sup>                      | Hibiscetin <i>O</i> -Hex- <i>O</i> -HexA <sup>L</sup>                                            | Hi38                    | +35                  | 673                | [673]: 511 (100), 335 (18)                     |
| 124 | 6.03 <sup>iv</sup>                      | Hibiscetin <i>O</i> -Mal- <i>O</i> -Hex- <i>O</i> -HexA <sup>L</sup>                             | Hi38                    | +35                  | 759                | [759]: 673 (21), 511 (100), 335 (18)           |
| 125 | 6.18 <sup>iv</sup>                      | Hibiscetin <i>O</i> -Ac- <i>O</i> -Hex- <i>O</i> -HexA <sup>L</sup>                              | Hi38                    | +35                  | 715                | [715]: 673 (25), 511 (100), 335 (15)           |
| 126 | 6.53 <sup>iv</sup>                      | Gossypetin 3- <i>O</i> -Glc-8- <i>O</i> -GlcA <sup>s</sup>                                       | G38                     | +35                  | 657                | [657]: 495 (100), 319 (22)                     |
| 127 | 6.97 <sup>iv</sup>                      | Gossypetin 3- <i>O</i> -(3''- <i>O</i> -Ac)-Glc-8- <i>O</i> -GlcA (=rhodiquadrin B) <sup>s</sup> | G38                     | +35                  | 699                | [699]: 523 (100), 319 (46)                     |
| 129 | 7.51 <sup>iv</sup>                      | Herbacetin 8- <i>O</i> -(2''- <i>O</i> -Glc)-GlcA (=rhodiquadrin C) <sup>s</sup>                 | H8                      | +35                  | 641                | [641]: 479 (100), 303 (43)                     |
| 130 | 7.62 <sup>iv</sup>                      | Herbacetin 3- <i>O</i> -Glc-8- <i>O</i> -GlcA <sup>s</sup>                                       | H38                     | +35                  | 641                | [641]: 479 (100), 303 (8)                      |
| 131 | 7.90 <sup>iv</sup>                      | Herbacetin <i>O</i> -Ac- <i>O</i> -Hex- <i>O</i> -HexA <sup>L</sup>                              | H38                     | +35                  | 683                | [683]: 507 (100), 303 (35)                     |
| 132 | 8.23 <sup>iv</sup>                      | Herbacetin 3- <i>O</i> -(3''- <i>O</i> -Ac)-Glc-8- <i>O</i> -GlcA <sup>s</sup>                   | H38                     | +35                  | 683                | [683]: 507 (100), 303 (32)                     |
| 133 | 8.48 <sup>iv</sup>                      | Gossypetin di- <i>O</i> -Ac- <i>O</i> -Hex- <i>O</i> -HexA <sup>L</sup>                          | G38                     | +35                  | 741                | [741]: 565 (100), 319 (31)                     |
| 134 | 8.73 <sup>iv</sup>                      | Gossypetin di- <i>O</i> -Ac- <i>O</i> -Hex- <i>O</i> -HexA <sup>L</sup>                          | G38                     | +35                  | 741                | [741]: 565 (100), 319 (28)                     |
| 135 | 8.98 <sup>iv</sup>                      | Herbacetin <i>O</i> -Ac- <i>O</i> -Hex- <i>O</i> -HexA <sup>L</sup>                              | H38                     | +35                  | 683                | [683]: 507 (100), 303 (25)                     |
| 136 | 9.49 <sup>iv</sup>                      | Herbacetin <i>O</i> -Ac- <i>O</i> -Hex- <i>O</i> -HexA <sup>L</sup>                              | H38                     | +35                  | 683                | [683]: 507 (100), 303 (29)                     |
| 137 | 10.47 <sup>iv</sup>                     | Herbacetin di- <i>O</i> -Ac- <i>O</i> -Hex- <i>O</i> -HexA <sup>L</sup>                          | H38                     | +35                  | 725                | [725]: 549 (100), 303 (22)                     |
| 138 | 11.25 <sup>iv</sup>                     | Gossypetin 8- <i>O</i> -GlcA(=hibifolin) <sup>s</sup>                                            | G8                      | +40                  | 495                | [495]: 319 (100)                               |
| 139 | 11.59 <sup>iv</sup>                     | Gossypetin <i>O</i> -Mal- <i>O</i> -HexA <sup>L</sup>                                            | G8                      | +35                  | 581                | [581]: 495 (100), 319 (72)                     |
| 140 | 11.98 <sup>iv</sup>                     | Gossypetin <i>O</i> -Mal- <i>O</i> -HexA <sup>L</sup>                                            | G8                      | +35                  | 581                | [581]: 495 (100), 319 (65)                     |
| 141 | 12.26 <sup>iv</sup>                     | Gossypetin <i>O</i> -Ac- <i>O</i> -HexA <sup>L</sup>                                             | G8                      | +35                  | 537                | [537]: 495 (100), 319 (62)                     |
| 142 | 12.61 <sup>iv</sup>                     | Gossypetin <i>O</i> -Ac- <i>O</i> -HexA <sup>L</sup>                                             | G8                      | +35                  | 537                | [537]: 495 (100), 319 (67)                     |
| 143 | 14.01 <sup>iv</sup>                     | Herbacetin 8- <i>O</i> -GlcA(=melocorin) <sup>s</sup>                                            | H8                      | +40                  | 479                | [479]: 303 (100)                               |
| 144 | 14.50 <sup>iv</sup>                     | Herbacetin <i>O</i> -Mal- <i>O</i> -HexA <sup>L</sup>                                            | H8                      | +35                  | 565                | [565]: 479 (100), 303 (82)                     |
| 145 | 15.37 <sup>iv</sup>                     | Herbacetin <i>O</i> -Ac- <i>O</i> -HexA <sup>L</sup>                                             | H8                      | +35                  | 521                | [521]: 479 (100), 303 (73)                     |
| 146 | 16.11 <sup>iv</sup>                     | Herbacetin <i>O</i> -Ac- <i>O</i> -HexA <sup>L</sup>                                             | H8                      | +35                  | 521                | [521]: 479 (100), 303 (70)                     |

<sup>a</sup> Chromatographic conditions: <sup>i</sup>—mode 1; <sup>ii</sup>—mode 2; <sup>iii</sup>—mode 3; <sup>iv</sup>—mode 4. <sup>b</sup> Compound identification was based on comparison of retention time, UV and MS spectral data with reference standard (<sup>s</sup>) or interpretation of UV and MS spectral data and comparison with literature data (<sup>L</sup>). <sup>c</sup> UV-patterns as listed in Table S5. <sup>d</sup> CE—collision energy. <sup>e</sup> Mass spectrometric data: deprotonated ion [M-H]<sup>-</sup>, negative ionization / protonated ion [M+H]<sup>+</sup>, positive ionization. <sup>f</sup> Signal intensity (percentage). Abbreviation used: Ac—acetyl; Araf—arabinofuranose; Arap—arabinopyranose; Glc—glucose; GlcA—glucuronic acid; Hex—hexose; HexA—hexuronic acid; Mal—malonyl; Pent—pentose; Rha—rhamnose; Xyl—xylose.

Table S5. UV-spectral patterns of compounds found in *R. rosea*.

| Name of UV-pattern | Group of compound                             | $\lambda_{max}$ , nm                                                                         |
|--------------------|-----------------------------------------------|----------------------------------------------------------------------------------------------|
| BZ                 | Benzyl alcohol derivatives                    | 205 ( $\pm 2$ )                                                                              |
| CAC                | Cinnamic acid                                 | 272                                                                                          |
| CIN                | Cinnamyl alcohol derivatives                  | 250 ( $\pm 2$ )                                                                              |
| CT                 | Catechins                                     | 275 ( $\pm 1$ )                                                                              |
| FQA                | Feruloylquinic acid                           | 324                                                                                          |
| G7                 | Gossypetin 7- <i>O</i> -glucosides            | 260 ( $\pm 3$ ), 276 sh ( $\pm 3$ ), 345 ( $\pm 4$ ), 385 ( $\pm 5$ )                        |
| G8                 | Gossypetin 8- <i>O</i> -glucosides            | 256 ( $\pm 3$ ), 270 sh ( $\pm 3$ ), 305 ( $\pm 3$ ), 377 ( $\pm 5$ )                        |
| G38                | Gossypetin 3,8-di- <i>O</i> -glucosides       | 258 ( $\pm 3$ ), 270 ( $\pm 2$ ), 355 ( $\pm 5$ )                                            |
| G78                | Gossypetin 7,8-di- <i>O</i> -glucosides       | 260 sh ( $\pm 3$ ), 276 ( $\pm 3$ ), 304 sh ( $\pm 4$ ), 340 ( $\pm 5$ ), 375 sh ( $\pm 5$ ) |
| G378               | Gossypetin 3,7,8-tri- <i>O</i> -glucosides    | 260 ( $\pm 3$ ), 270 sh ( $\pm 3$ ), 365 ( $\pm 6$ )                                         |
| GA                 | Galloyl glucoses                              | 277 ( $\pm 2$ ), 300 sh ( $\pm 4$ )                                                          |
| H3                 | Herbacetin 3- <i>O</i> -glucosides            | 282 ( $\pm 3$ ), 302 ( $\pm 5$ ), 330 ( $\pm 5$ ), 375 ( $\pm 7$ )                           |
| H7                 | Herbacetin 7- <i>O</i> -glucosides            | 276 ( $\pm 3$ ), 330 ( $\pm 5$ ), 385 ( $\pm 5$ )                                            |
| H8                 | Herbacetin 8- <i>O</i> -glucosides            | 255 sh ( $\pm 3$ ), 272 ( $\pm 3$ ), 326 ( $\pm 4$ ), 374 ( $\pm 5$ )                        |
| H37                | Herbacetin 3,7-di- <i>O</i> -glucosides       | 275 ( $\pm 3$ ), 306 ( $\pm 3$ ), 330 ( $\pm 3$ ), 370 sh ( $\pm 4$ )                        |
| H38                | Herbacetin 3,8-di- <i>O</i> -glucosides       | 272 ( $\pm 3$ ), 330 sh ( $\pm 2$ ), 360 ( $\pm 5$ )                                         |
| H78                | Herbacetin 7,8-di- <i>O</i> -glucosides       | 276 ( $\pm 2$ ), 306 ( $\pm 3$ ), 332 ( $\pm 3$ ), 370 sh ( $\pm 6$ )                        |
| H378               | Herbacetin 3,7,8-tri- <i>O</i> -glucosides    | 270 ( $\pm 3$ ), 326 sh ( $\pm 3$ ), 356 ( $\pm 4$ )                                         |
| Hi38               | Hibiscetin 3,8-di- <i>O</i> -glucosides       | 255 sh ( $\pm 4$ ), 270 ( $\pm 4$ ), 300 ( $\pm 2$ ), 365 ( $\pm 5$ )                        |
| HNG                | Hydroxynitrile glucosides                     | 207 ( $\pm 1$ )                                                                              |
| HQ                 | Hydroquinone derivatives                      | 282 ( $\pm 1$ )                                                                              |
| K3                 | Kaempferol 3- <i>O</i> -glucosides            | 265 ( $\pm 3$ ), 290 ( $\pm 2$ ), 320 ( $\pm 3$ ), 345 ( $\pm 6$ )                           |
| K7                 | Kaempferol 7- <i>O</i> -glucosides            | 252 ( $\pm 3$ ), 265 ( $\pm 3$ ), 322 ( $\pm 3$ ), 360 ( $\pm 5$ )                           |
| K37                | Kaempferol 3,7-di- <i>O</i> -glucosides       | 245 sh ( $\pm 3$ ), 265 ( $\pm 2$ ), 315 sh ( $\pm 3$ ), 350 ( $\pm 6$ )                     |
| NA                 | No absorption > 200 nm                        | 195–200                                                                                      |
| PC                 | Procyanidins                                  | 270 ( $\pm 2$ )                                                                              |
| pHCA               | <i>p</i> -Hydroxycinnamyl alcohol derivatives | 280 ( $\pm 2$ )                                                                              |
| pMCA               | <i>p</i> -Methoxycinnamyl alcohol derivatives | 306 ( $\pm 2$ )                                                                              |
| Q3                 | Quercetin 3- <i>O</i> -glucosides             | 256 ( $\pm 3$ ), 267 ( $\pm 2$ ), 292 ( $\pm 3$ ), 362 ( $\pm 4$ )                           |
| Q37                | Quercetin 3,7-di- <i>O</i> -glucosides        | 255 ( $\pm 3$ ), 267 ( $\pm 3$ ), 355 ( $\pm 5$ )                                            |
| TY                 | Tyrosol derivatives                           | 225 ( $\pm 2$ ), 275 ( $\pm 2$ )                                                             |

sh—shoulder.

**Table S6.** Selected spectra of compounds found in *R. rosea*.

| No | Compound                                                                                                                                                                                    | MS/MS spectra                                                                        |
|----|---------------------------------------------------------------------------------------------------------------------------------------------------------------------------------------------|--------------------------------------------------------------------------------------|
| 34 | Hexa- <i>O</i> -galloyl glucose<br>(galloyl <i>O</i> -glycoside)<br><br>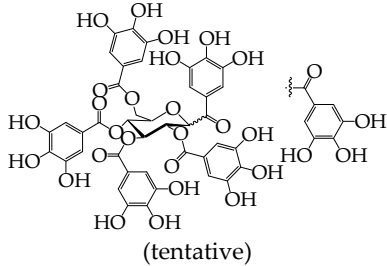<br>(tentative)                    |    |
| 42 | Procyanidin pentamer<br>(EGC-EGC-EGC-EGC-EGCG)<br>(procyanidin)<br><br><br>(tentative)                    |   |
| 45 | Hydroquinone <i>O</i> -hexoside- <i>O</i> -pentoside<br>(hydroquinone derivative)<br><br><br>(tentative) |  |
| 47 | Tyrosol <i>O</i> -hexoside- <i>O</i> -pentoside<br>(tyrosol derivative)<br><br><br>(tentative)           |  |



Table S6. Cont.

| No | Compound                                                                                                                                                                                  | MS/MS spectra                                                                        |
|----|-------------------------------------------------------------------------------------------------------------------------------------------------------------------------------------------|--------------------------------------------------------------------------------------|
| 52 | Benzyl alcohol <i>O</i> -hexoside- <i>O</i> -pentoside<br>(benzyl alcohol derivative)<br>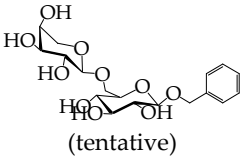<br>(tentative) |    |
| 62 | Rosiridol <i>O</i> -hexoside-di- <i>O</i> -pentoside<br>(rosiridol derivative)<br><br>(tentative)       |   |
| 67 | Tyrosol <i>O</i> -hexoside-di- <i>O</i> -acetate<br>(tyrosol derivative)<br><br>(tentative)            |  |
| 79 | Rosiridol <i>O</i> -hexoside-di- <i>O</i> -acetate<br>(rosiridol derivative)<br><br>(tentative)        |  |

Table S6. Cont.

| No  | Compound                                                                                                                     | MS/MS, UV spectra (in windows)                                                                                                                  |
|-----|------------------------------------------------------------------------------------------------------------------------------|-------------------------------------------------------------------------------------------------------------------------------------------------|
| 96  | Gossypetin 7- <i>O</i> -Rha-8- <i>O</i> -Glc = rhodiogidin<br>(neutral gossypetin 7,8-di- <i>O</i> -glycoside)               | <p>Event: MS/MS Scan (Pos.) [m/z 627] Ret.time [6.82]</p> 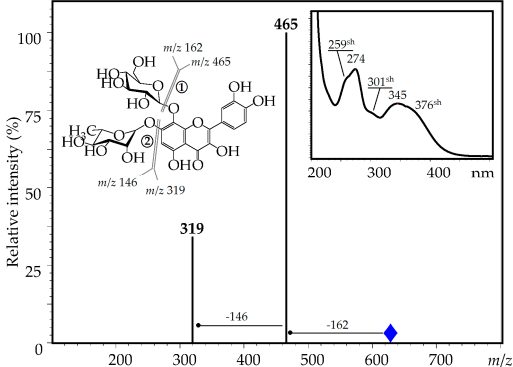    |
| 99  | Herbacetin 7- <i>O</i> -Rha-8- <i>O</i> -Glc = rhodionidin<br>(neutral herbacetin 7,8-di- <i>O</i> -glycoside)               | <p>Event: MS/MS Scan (Pos.) [m/z 611] Ret.time [7.35]</p>    |
| 112 | Herbacetin 7- <i>O</i> -Rha = rhodionin<br>(neutral herbacetin 7- <i>O</i> -glycoside)                                       | <p>Event: MS/MS Scan (Pos.) [m/z 449] Ret.time [10.46]</p>  |
| 116 | Gossypetin di- <i>O</i> -hexoside- <i>O</i> -hexuronide<br>(acidic gossypetin 3,7,8-tri- <i>O</i> -glycoside)<br>(tentative) | <p>Event: MS/MS Scan (Pos.) [m/z 819] Ret.time [2.58]</p>   |

Table S6. Cont.

| No  | Compound                                                                                                      | MS/MS, UV spectra (in windows)                                                                                                                         |
|-----|---------------------------------------------------------------------------------------------------------------|--------------------------------------------------------------------------------------------------------------------------------------------------------|
| 120 | Herbacetin di- <i>O</i> -hexoside- <i>O</i> -hexuronide<br>(acidic herbacetin 3,7,8-tri- <i>O</i> -glycoside) | <p>Event: MS/MS Scan (Pos.) [<i>m/z</i>: 803] Ret.time [4.63]</p> 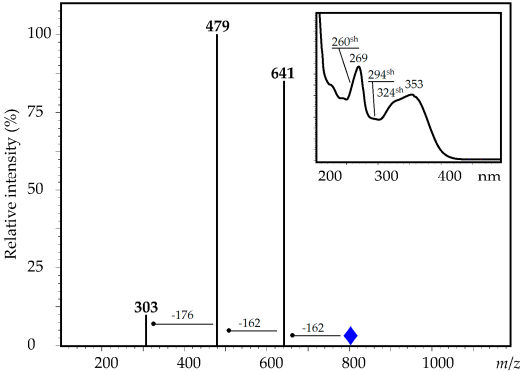   |
| 123 | Hibiscetin <i>O</i> -hexoside- <i>O</i> -hexuronide<br>(acidic hibiscetin 3,8-di- <i>O</i> -glycoside)        | <p>Event: MS/MS Scan (Pos.) [<i>m/z</i>: 673] Ret.time [5.52]</p>   |
| 126 | Gossypetin 3- <i>O</i> -glucoside-8- <i>O</i> -glucuronide<br>(acidic gossypetin 3,8-di- <i>O</i> -glycoside) | <p>Event: MS/MS Scan (Pos.) [<i>m/z</i>: 627] Ret.time [6.53]</p>  |
| 130 | Herbacetin 3- <i>O</i> -glucoside-8- <i>O</i> -glucuronide<br>(acidic herbacetin 3,8-di- <i>O</i> -glycoside) | <p>Event: MS/MS Scan (Pos.) [<i>m/z</i>: 641] Ret.time [7.62]</p>  |

Table S6. Cont.

| No  | Compound                                                                                                                                                         | MS/MS, UV spectra (in windows)                                                                                                                                                                                                                                                                                                                                         |
|-----|------------------------------------------------------------------------------------------------------------------------------------------------------------------|------------------------------------------------------------------------------------------------------------------------------------------------------------------------------------------------------------------------------------------------------------------------------------------------------------------------------------------------------------------------|
| 138 | Gossypetin 8-O-glucuronide = hibifolin<br>(acidic gossypetin 8-O-glycoside)<br>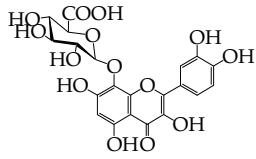 |  <p>Event: MS/MS Scan (Pos.) [m/z 495] Ret.time [11.25]</p> <p>Relative intensity (%)</p> <p>100</p> <p>75</p> <p>50</p> <p>25</p> <p>0</p> <p>200 300 400 500 600 700 m/z</p> <p>319</p> <p>176</p> <p>257</p> <p>272<sup>sh</sup></p> <p>306<sup>sh</sup></p> <p>376</p> <p>nm</p> |
| 143 | Herbacetin 8-O-GlcA = melocorin<br>(acidic herbacetin 8-O-glycoside)<br>        |  <p>Event: MS/MS Scan (Pos.) [m/z 479] Ret.time [14.01]</p> <p>Relative intensity (%)</p> <p>100</p> <p>75</p> <p>50</p> <p>25</p> <p>0</p> <p>200 300 400 500 600 700 m/z</p> <p>303</p> <p>176</p> <p>256<sup>sh</sup></p> <p>270</p> <p>327</p> <p>372</p> <p>nm</p>             |

Table S7. Known flavonol glycosides of *R. rosea*.

| Compound                                                                                                           | Presence in <i>R. rosea</i> organ [ref.] |         |         |
|--------------------------------------------------------------------------------------------------------------------|------------------------------------------|---------|---------|
|                                                                                                                    | Roots/Rhizomes                           | Leaves  | Flowers |
| Kaempferol group (9)                                                                                               |                                          |         |         |
| Kaempferol-3- <i>O</i> - $\alpha$ L-Rhap (=afzelin)                                                                | [2]                                      |         |         |
| Kaempferol-3- <i>O</i> - $\beta$ D-Glcp (=astragalin)                                                              | [2]                                      |         |         |
| Kaempferol-3- <i>O</i> -(2''- <i>O</i> - $\beta$ D-Xylp)- $\beta$ D-Glcp (=leucoside)                              | [54]                                     |         |         |
| Kaempferol-7- <i>O</i> - $\alpha$ L-Rhap                                                                           | [56]                                     |         |         |
| Kaempferol-7- <i>O</i> -(2''- <i>O</i> - $\alpha$ L-Rhap)- $\beta$ D-Glcp                                          | [2]                                      |         |         |
| Kaempferol-3- <i>O</i> - $\alpha$ L-Rhap-7- <i>O</i> - $\beta$ D-Glcp                                              |                                          | [15]    | [15]    |
| Kaempferol-3- <i>O</i> - $\beta$ D-Glcp-7- <i>O</i> - $\alpha$ L-Rhap                                              | [54]                                     |         |         |
| Kaempferol-3- <i>O</i> -(6''- <i>O</i> - $\alpha$ L-Rhap)- $\beta$ D-Galp-7- <i>O</i> - $\alpha$ L-Rhap (=robinin) | [2]                                      |         |         |
| Kaempferol-3,7-di- <i>O</i> - $\beta$ D-Glcp                                                                       |                                          | [15]    | [15]    |
| Quercetin group (2)                                                                                                |                                          |         |         |
| Quercetin-3- <i>O</i> - $\alpha$ L-Rhap (=quercitrin)                                                              | [2]                                      |         |         |
| Quercetin-3- <i>O</i> - $\alpha$ L-Rhap-7- <i>O</i> - $\beta$ D-Glcp                                               |                                          | [15]    | [15]    |
| Herbacetin group (11)                                                                                              |                                          |         |         |
| Herbacetin 8- <i>O</i> -methyl ester                                                                               | [56]                                     |         |         |
| Herbacetin-7- <i>O</i> - $\alpha$ L-Rhap (=rhodionin)                                                              | [55]                                     |         | [13,14] |
| Herbacetin-7- <i>O</i> -(3''- <i>O</i> - $\beta$ D-Glcp)- $\alpha$ L-Rhap (=rhodiosin)                             | [55]                                     |         |         |
| Herbacetin-8- <i>O</i> - $\beta$ D-Xylp (=rhodalinal)                                                              |                                          | [14]    | [14]    |
| Herbacetin-8- <i>O</i> -(3''- <i>O</i> -Ac)- $\beta$ D-Xylp (=acetyl rhodalinal)                                   | [56]                                     |         |         |
| Herbacetin-8- <i>O</i> - $\beta$ D-Glcp (=alginin, herbacin)                                                       | [54]                                     |         |         |
| Herbacetin-3- <i>O</i> - $\beta$ D-Glcp-7- <i>O</i> - $\alpha$ L-Arap                                              |                                          | [15]    | [15]    |
| Herbacetin-3- <i>O</i> - $\beta$ D-Glcp-7- <i>O</i> - $\beta$ D-Xylp                                               |                                          | [15]    | [15]    |
| Herbacetin-3- <i>O</i> - $\beta$ D-Glcp-7- <i>O</i> - $\alpha$ L-Rhap (=sinocrassoside C1)                         | [54]                                     |         |         |
| Herbacetin-3- <i>O</i> - $\beta$ D-Glcp-8- <i>O</i> - $\beta$ D-Xylp (=rhodalidin)                                 |                                          | [13,14] |         |
| Herbacetin-7- <i>O</i> - $\alpha$ L-Rhap-8- <i>O</i> - $\beta$ D-Glcp (=rhodionidin)                               |                                          | [13,14] | [13,14] |
| Gossypetin group (5)                                                                                               |                                          |         |         |
| Gossypetin-7- <i>O</i> - $\alpha$ L-Rhap (=rhodiogin)                                                              |                                          |         | [13,14] |
| Gossypetin-7- <i>O</i> -(3''- <i>O</i> - $\beta$ D-Glcp)- $\alpha$ L-Rhap (=rhodioflavonoside)                     | [53]                                     |         |         |
| Gossypetin-3- <i>O</i> - $\beta$ D-Glcp-7- <i>O</i> - $\alpha$ L-Arap                                              |                                          | [15]    | [15]    |
| Gossypetin-3- <i>O</i> - $\beta$ D-Glcp-7- <i>O</i> - $\beta$ D-Xylp                                               |                                          | [15]    | [15]    |
| Gossypetin-7- <i>O</i> - $\alpha$ L-Rhap-8- <i>O</i> - $\beta$ D-Glcp (=rhodiogidin)                               |                                          | [13,14] | [13,14] |
| Tricin group (2)                                                                                                   |                                          |         |         |
| Tricin-5- <i>O</i> - $\beta$ D-Glcp                                                                                | [70]                                     |         |         |
| Tricin-7- <i>O</i> - $\beta$ D-Glcp                                                                                | [70]                                     |         |         |

Ac—acetyl;  $\alpha$ L-Arap— $\alpha$ -L-arabinopyranose;  $\beta$ D-Galp— $\beta$ -D-galactopyranose;  $\beta$ D-Glcp— $\beta$ -D-glucopyranose;  $\alpha$ L-Rhap— $\alpha$ -L-rhamnopyranose;  $\beta$ D-Xylp— $\beta$ -D-xylopyranose.

Table S8. Quantitative content of compounds 1–146 in *R. rosea* organs, mg/g dry plant weight  $\pm$  S.D. <sup>a</sup>

| No | Compound <sup>b</sup>                         | Roots            | Rhizome          | Leaves                        | Flowers                       | Stems                        |
|----|-----------------------------------------------|------------------|------------------|-------------------------------|-------------------------------|------------------------------|
| 1  | 1-O-Galloyl glucose                           | 0.32 $\pm$ 0.01  | 0.09 $\pm$ 0.00  | 0.12 $\pm$ 0.00               | 0.12 $\pm$ 0.00               | 0.10 $\pm$ 0.00              |
| 2  | O-Galloyl glucose                             | 0.29 $\pm$ 0.00  | 0.21 $\pm$ 0.00  | 0.14 $\pm$ 0.00               | 0.36 $\pm$ 0.01               | 0.09 $\pm$ 0.00              |
| 3  | O-Galloyl glucose                             | n.d.             | n.d.             | 0.79 $\pm$ 0.02               | n.d.                          | 0.10 $\pm$ 0.00              |
| 4  | O-Galloyl glucose                             | n.d.             | n.d.             | n.d.                          | n.d.                          | 0.31 $\pm$ 0.00              |
| 5  | Gallic acid                                   | 1.72 $\pm$ 0.03  | 1.19 $\pm$ 0.02  | 1.67 $\pm$ 0.03               | 1.52 $\pm$ 0.03               | 0.27 $\pm$ 0.00              |
| 6  | Di-O-galloyl glucose                          | traces           | traces           | n.d.                          | n.d.                          | n.d.                         |
| 7  | 1,6-Di-O-galloyl glucose                      | 2.29 $\pm$ 0.04  | 1.17 $\pm$ 0.02  | 10.35 $\pm$ 0.21              | 1.56 $\pm$ 0.03               | 3.89 $\pm$ 0.06              |
| 8  | Procyanidin dimer (EGC-EGC)                   | 0.02 $\pm$ 0.00  | 0.34 $\pm$ 0.00  | n.d.                          | 0.19 $\pm$ 0.00               | 0.15 $\pm$ 0.00              |
| 9  | Gallocatechin                                 | 0.29 $\pm$ 0.00  | 2.08 $\pm$ 0.04  | n.d.                          | n.d.                          | 0.12 $\pm$ 0.00              |
| 10 | Epigallocatechin                              | 0.12 $\pm$ 0.00  | 1.36 $\pm$ 0.02  | n.d.                          | n.d.                          | n.d.                         |
| 11 | Procyanidin dimer (EGC-EGCG)                  | 3.48 $\pm$ 0.07  | 14.55 $\pm$ 0.27 | n.d.                          | traces                        | n.d.                         |
| 12 | Catechin                                      | 1.52 $\pm$ 0.03  | 4.11 $\pm$ 0.07  | n.d.                          | n.d.                          | n.d.                         |
| 13 | Tri-O-galloyl glucose                         | n.d.             | n.d.             | 0.64 $\pm$ 0.01               | n.d.                          | 0.45 $\pm$ 0.01              |
| 14 | Procyanidin dimer (EGCG-EGCG)                 | traces           | 0.59 $\pm$ 0.01  | n.d.                          | n.d.                          | n.d.                         |
| 15 | Procyanidin trimer (EGC-EGC-EGC)              | 0.11 $\pm$ 0.00  | 0.67 $\pm$ 0.01  | n.d.                          | n.d.                          | n.d.                         |
| 16 | Procyanidin trimer (EGC-EGC-EGCG)             | 3.36 $\pm$ 0.06  | 10.68 $\pm$ 0.22 | n.d.                          | n.d.                          | n.d.                         |
| 17 | 1,3,6-Tri-O-galloyl glucose                   | n.d.             | n.d.             | 1.31 $\pm$ 0.02               | n.d.                          | 0.27 $\pm$ 0.00              |
| 18 | Tri-O-galloyl glucose                         | 0.83 $\pm$ 0.02  | 0.42 $\pm$ 0.01  | n.d.                          | n.d.                          | 0.32 $\pm$ 0.00              |
| 19 | Procyanidin trimer (EGC-EGCG-EGCG)            | traces           | 0.49 $\pm$ 0.01  | n.d.                          | n.d.                          | n.d.                         |
| 20 | Procyanidin trimer (EGCG-EGCG-EGCG)           | traces           | 0.45 $\pm$ 0.01  | n.d.                          | n.d.                          | n.d.                         |
| 21 | Procyanidin tetramer (EGC-EGC-EGC-EGCG)       | traces           | 0.22 $\pm$ 0.00  | n.d.                          | n.d.                          | n.d.                         |
| 22 | Epicatechin                                   | 4.47 $\pm$ 0.09  | 19.08 $\pm$ 0.38 | n.d.                          | n.d.                          | n.d.                         |
| 23 | Epigallocatechin gallate                      | 1.48 $\pm$ 0.03  | 9.48 $\pm$ 0.19  | n.d.                          | n.d.                          | n.d.                         |
| 24 | Gallocatechin gallate                         | 1.89 $\pm$ 0.04  | 12.44 $\pm$ 0.25 | n.d.                          | n.d.                          | n.d.                         |
| 25 | Procyanidin tetramer (EGC-EGC-EGCG-EGCG)      | traces           | traces           | n.d.                          | n.d.                          | n.d.                         |
| 26 | Procyanidin tetramer (EGC-EGCG-EGCG-EGCG)     | 0.10 $\pm$ 0.00  | 0.68 $\pm$ 0.01  | n.d.                          | n.d.                          | n.d.                         |
| 27 | Tetra-O-galloyl glucose                       | n.d.             | n.d.             | n.d.                          | 1.94 $\pm$ 0.04               | n.d.                         |
| 28 | 1,2,3,6-Tetra-O-galloyl glucose               | n.d.             | n.d.             | 4.77 $\pm$ 0.09               | 4.38 $\pm$ 0.08               | 1.42 $\pm$ 0.03              |
| 29 | Tetra-O-galloyl glucose                       | n.d.             | n.d.             | n.d.                          | 1.67 $\pm$ 0.04               | n.d.                         |
| 30 | Epicatechin gallate                           | 0.50 $\pm$ 0.01  | 5.12 $\pm$ 0.10  | n.d.                          | n.d.                          | n.d.                         |
| 31 | Tetra-O-galloyl glucose                       | n.d.             | n.d.             | n.d.                          | traces                        | n.d.                         |
| 32 | Penta-O-galloyl glucose                       | n.d.             | n.d.             | 7.15 $\pm$ 0.14               | 5.97 $\pm$ 0.11               | 0.72 $\pm$ 0.02              |
| 33 | 1,2,3,4,6-Penta-O-galloyl glucose             | n.d.             | n.d.             | 18.45 $\pm$ 0.37              | 6.24 $\pm$ 0.12               | 0.22 $\pm$ 0.00              |
| 34 | Hexa-O-galloyl glucose                        | n.d.             | n.d.             | n.d.                          | n.d.                          | n.d.                         |
| 35 | Hexa-O-galloyl glucose                        | n.d.             | n.d.             | 37.79 $\pm$ 0.74 <sup>c</sup> | 24.02 $\pm$ 0.49 <sup>c</sup> | 2.22 $\pm$ 0.04 <sup>c</sup> |
| 36 | Catechin gallate                              | 0.31 $\pm$ 0.00  | 3.73 $\pm$ 0.07  | n.d.                          | n.d.                          | n.d.                         |
| 37 | Hepta-O-galloyl glucose                       | n.d.             | n.d.             | 17.45 $\pm$ 0.34 <sup>d</sup> | 19.10 $\pm$ 0.37 <sup>d</sup> | 0.51 $\pm$ 0.01 <sup>d</sup> |
| 38 | Hepta-O-galloyl glucose                       | n.d.             | n.d.             | n.d.                          | n.d.                          | n.d.                         |
| 39 | Octa-O-galloyl glucose                        | n.d.             | n.d.             | n.d.                          | 0.70 $\pm$ 0.02               | n.d.                         |
| 40 | Octa-O-galloyl glucose                        | n.d.             | n.d.             | n.d.                          | 0.61 $\pm$ 0.01               | 0.09 $\pm$ 0.00              |
| 41 | Procyanidin tetramer (EGCG-EGCG-EGCG-EGCG)    | 0.14 $\pm$ 0.00  | 0.24 $\pm$ 0.00  | n.d.                          | 1.10 $\pm$ 0.02               | 0.08 $\pm$ 0.00              |
| 42 | Procyanidin pentamer (EGC-EGC-EGC-EGC-EGCG)   | traces           | 1.39 $\pm$ 0.02  | n.d.                          | 1.34 $\pm$ 0.02               | n.d.                         |
| 43 | Procyanidin pentamer (EGC-EGC-EGC-EGCG-EGCG)  | 0.52 $\pm$ 0.01  | 1.79 $\pm$ 0.03  | n.d.                          | traces                        | n.d.                         |
| 44 | Procyanidin pentamer (EGC-EGC-EGCG-EGCG-EGCG) | 1.04 $\pm$ 0.02  | 2.72 $\pm$ 0.05  | n.d.                          | 0.39 $\pm$ 0.00               | n.d.                         |
| 45 | Hydroquinone O-Hex-O-Pent                     | 0.52 $\pm$ 0.01  | 2.92 $\pm$ 0.06  | 6.27 $\pm$ 0.14               | 11.39 $\pm$ 0.22              | traces                       |
| 46 | Hydroquinone O-Glc (=arbutin)                 | 4.12 $\pm$ 0.08  | 5.95 $\pm$ 0.11  | 10.35 $\pm$ 0.21              | 12.65 $\pm$ 0.25              | 2.67 $\pm$ 0.05              |
| 47 | Tyrosol O-Hex-O-Pent                          | 0.93 $\pm$ 0.02  | 2.95 $\pm$ 0.05  | 0.09 $\pm$ 0.00               | 0.59 $\pm$ 0.01               | traces                       |
| 48 | Tyrosol O-Glc (=salidroside)                  | 1.04 $\pm$ 0.02  | 15.06 $\pm$ 0.29 | 0.53 $\pm$ 0.01               | 0.94 $\pm$ 0.02               | traces                       |
| 49 | Tyrosol O-dHex                                | n.d.             | n.d.             | traces                        | traces                        | traces                       |
| 50 | Tyrosol (=p-hydroxyphenethyl alcohol)         | traces           | 1.54 $\pm$ 0.03  | traces                        | traces                        | traces                       |
| 51 | Benzyl alcohol O-Hex-O-Pent                   | traces           | traces           | traces                        | traces                        | traces                       |
| 52 | Benzyl alcohol O-Hex-O-Pent                   | traces           | traces           | traces                        | traces                        | traces                       |
| 53 | Benzyl alcohol O-Hex                          | traces           | traces           | traces                        | traces                        | traces                       |
| 54 | p-Hydroxycinnamyl alcohol O-Hex-O-Pent        | traces           | 3.44 $\pm$ 0.07  | n.d.                          | n.d.                          | n.d.                         |
| 55 | p-Hydroxycinnamyl alcohol O-Glc (=triandrin)  | traces           | 2.86 $\pm$ 0.05  | 0.58 $\pm$ 0.01               | 1.10 $\pm$ 0.02               | 0.39 $\pm$ 0.00              |
| 56 | Benzyl alcohol                                | traces           | traces           | traces                        | traces                        | traces                       |
| 57 | Rhodiocyanoside A/D O-Pent                    | traces           | traces           | n.d.                          | n.d.                          | n.d.                         |
| 58 | Rhodiocyanoside D                             | traces           | traces           | traces                        | traces                        | traces                       |
| 59 | Rhodiocyanoside A                             | 0.97 $\pm$ 0.02  | 2.64 $\pm$ 0.05  | 1.42 $\pm$ 0.03               | 2.66 $\pm$ 0.05               | 0.58 $\pm$ 0.01              |
| 60 | Rosiridol di-O-Hex-O-Pent                     | n.d.             | n.d.             | traces                        | traces                        | traces                       |
| 61 | Rosiridol O-Hex-di-O-Pent                     | n.d.             | n.d.             | traces                        | traces                        | traces                       |
| 62 | Rosiridol O-Hex-di-O-Pent                     | n.d.             | n.d.             | n.d.                          | n.d.                          | n.d.                         |
| 63 | Rosiridol O-Hex-O-Pent                        | traces           | 2.07 $\pm$ 0.04  | traces                        | 1.20 $\pm$ 0.02               | traces                       |
| 64 | Rosiridol O-Hex-O-Pent                        | traces           | 3.11 $\pm$ 0.06  | 0.53 $\pm$ 0.01               | 1.83 $\pm$ 0.03               | traces                       |
| 65 | Tyrosol O-Hex-O-Ac                            | traces           | 0.57 $\pm$ 0.01  | traces                        | traces                        | traces                       |
| 66 | Tyrosol O-Hex-O-Ac                            | n.d.             | n.d.             | traces                        | 0.09 $\pm$ 0.00               | traces                       |
| 67 | Tyrosol O-Hex-di-O-Ac                         | n.d.             | n.d.             | traces                        | 0.25 $\pm$ 0.00               | traces                       |
| 68 | Cinnamyl alcohol O-Hex-di-O-Pent              | traces           | 0.85 $\pm$ 0.01  | n.d.                          | n.d.                          | n.d.                         |
| 69 | Cinnamyl alcohol O-Hex-di-O-Pent              | traces           | traces           | n.d.                          | n.d.                          | n.d.                         |
| 70 | Cinnamyl alcohol O-(6'-O-Araf)-Glc (=rosarin) | 6.03 $\pm$ 0.12  | 14.20 $\pm$ 0.27 | n.d.                          | n.d.                          | n.d.                         |
| 71 | Cinnamyl alcohol O-(6'-O-Arap)-Glc (=rosavin) | 10.46 $\pm$ 0.21 | 22.95 $\pm$ 0.45 | n.d.                          | n.d.                          | n.d.                         |

Table S8. Cont.

| No  | Compound                                                                           | Roots       | Rhizome     | Leaves       | Flowers      | Stems       |
|-----|------------------------------------------------------------------------------------|-------------|-------------|--------------|--------------|-------------|
| 72  | Cinnamyl alcohol <i>O</i> -Hex- <i>O</i> -Pent                                     | 0.29 ± 0.00 | 1.54 ± 0.03 | n.d.         | n.d.         | n.d.        |
| 73  | Cinnamyl alcohol <i>O</i> -Glc (=rosin)                                            | 3.11 ± 0.06 | 7.88 ± 0.15 | n.d.         | n.d.         | n.d.        |
| 74  | Rosiridol 1- <i>O</i> -Glc (=rosiridin)                                            | traces      | traces      | traces       | 0.86 ± 0.02  | traces      |
| 75  | <i>p</i> -Hydroxycinnamyl alcohol <i>O</i> -Hex- <i>O</i> -Ac                      | n.d.        | n.d.        | traces       | 0.11 ± 0.00  | traces      |
| 76  | <i>p</i> -Hydroxycinnamyl alcohol <i>O</i> -Hex- <i>O</i> -Ac                      | n.d.        | n.d.        | traces       | 0.06 ± 0.00  | traces      |
| 77  | Rosiridol <i>O</i> -Hex- <i>O</i> -Ac                                              | n.d.        | n.d.        | traces       | 1.42 ± 0.03  | traces      |
| 78  | Rosiridol <i>O</i> -Hex-di- <i>O</i> -Ac                                           | n.d.        | n.d.        | traces       | 0.46 ± 0.01  | traces      |
| 79  | Rosiridol <i>O</i> -Hex-di- <i>O</i> -Ac                                           | n.d.        | n.d.        | traces       | 0.68 ± 0.01  | traces      |
| 80  | <i>p</i> -Methoxycinnamyl alcohol <i>O</i> -Hex- <i>O</i> -Pent                    | traces      | 0.89 ± 0.02 | n.d.         | n.d.         | n.d.        |
| 81  | <i>p</i> -Methoxycinnamyl alcohol <i>O</i> -Hex- <i>O</i> -Pent                    | traces      | traces      | n.d.         | n.d.         | n.d.        |
| 82  | <i>p</i> -Methoxycinnamyl alcohol <i>O</i> -Glc (=vimalin)                         | traces      | traces      | n.d.         | n.d.         | n.d.        |
| 83  | Cinnamyl alcohol                                                                   | traces      | traces      | n.d.         | n.d.         | n.d.        |
| 84  | Cinnamic acid                                                                      | traces      | traces      | n.d.         | n.d.         | n.d.        |
| 85  | <i>p</i> -Methoxycinnamyl alcohol                                                  | traces      | 1.15 ± 0.02 | n.d.         | n.d.         | n.d.        |
| 86  | Kaempferol tri- <i>O</i> -Hex- <i>O</i> -dHex (S37)                                | n.d.        | n.d.        | n.d.         | traces       | n.d.        |
| 87  | Herbacetin tri- <i>O</i> -Hex- <i>O</i> -dHex (S78)                                | n.d.        | n.d.        | traces       | traces       | n.d.        |
| 88  | Gossypetin di- <i>O</i> -Hex- <i>O</i> -dHex (S78)                                 | n.d.        | n.d.        | traces       | traces       | n.d.        |
| 89  | Quercetin di- <i>O</i> -Hex- <i>O</i> -dHex (S37)                                  | n.d.        | n.d.        | traces       | traces       | n.d.        |
| 90  | Kaempferol di- <i>O</i> -Hex- <i>O</i> -dHex (S37)                                 | traces      | traces      | traces       | traces       | n.d.        |
| 91  | Gossypetin di- <i>O</i> -Hex (S8)                                                  | n.d.        | n.d.        | n.d.         | traces       | n.d.        |
| 92  | Herbacetin di- <i>O</i> -Hex- <i>O</i> -dHex (S78)                                 | n.d.        | n.d.        | traces       | traces       | n.d.        |
| 93  | Gossypetin di- <i>O</i> -Hex (S38)                                                 | n.d.        | n.d.        | n.d.         | traces       | n.d.        |
| 94  | Gossypetin 7- <i>O</i> -(3'- <i>O</i> -Glc)-Rha (=rhodiflavonoside)                | traces      | traces      | traces       | traces       | n.d.        |
| 95  | Herbacetin 7- <i>O</i> -(3'- <i>O</i> -Glc)-Rha (=rhodiosin)                       | n.d.        | n.d.        | traces       | 1.32 ± 0.02  | n.d.        |
| 96  | Gossypetin 7- <i>O</i> -Rha-8- <i>O</i> -Glc (=rhodioglidin)                       | n.d.        | n.d.        | traces       | 17.62 ± 0.35 | 0.35 ± 0.00 |
| 97  | Kaempferol <i>O</i> -Hex- <i>O</i> -dHex (S7)                                      | n.d.        | n.d.        | traces       | traces       | n.d.        |
| 98  | Herbacetin-8- <i>O</i> -Xyl (=rhodalin)                                            | 0.10 ± 0.00 | 0.02 ± 0.00 | traces       | traces       | n.d.        |
| 99  | Herbacetin 7- <i>O</i> -Rha-8- <i>O</i> -Glc (=rhodionidin)                        | traces      | traces      | traces       | 20.42 ± 0.41 | 1.39 ± 0.02 |
| 100 | Quercetin 3,7-di- <i>O</i> -Glc                                                    | n.d.        | n.d.        | n.d.         | traces       | n.d.        |
| 101 | Kaempferol 3,7-di- <i>O</i> -Glc                                                   | traces      | traces      | n.d.         | traces       | n.d.        |
| 102 | Quercetin 3- <i>O</i> -Glc-7- <i>O</i> -Rha                                        | n.d.        | n.d.        | traces       | traces       | n.d.        |
| 103 | Kaempferol 3- <i>O</i> -Glc-7- <i>O</i> -Rha                                       | traces      | traces      | traces       | 0.09 ± 0.00  | n.d.        |
| 104 | Gossypetin 8- <i>O</i> -Glc (=gossypin)                                            | n.d.        | n.d.        | n.d.         | traces       | n.d.        |
| 105 | Kaempferol 3,7-di- <i>O</i> -Rha (=kaempferitrin)                                  | n.d.        | n.d.        | n.d.         | traces       | n.d.        |
| 106 | Gossypetin 7- <i>O</i> -Rha (=rhodioglin)                                          | n.d.        | n.d.        | n.d.         | traces       | n.d.        |
| 107 | Quercetin 3- <i>O</i> -Glc (=isoquercitrin)                                        | traces      | traces      | traces       | 0.08 ± 0.00  | n.d.        |
| 108 | Quercetin 3- <i>O</i> -Rha (=quercitrin)                                           | traces      | traces      | n.d.         | traces       | n.d.        |
| 109 | Herbacetin 8- <i>O</i> -Glc (=herbacin)                                            | traces      | traces      | traces       | traces       | n.d.        |
| 110 | Herbacetin <i>O</i> -dHex (S8)                                                     | traces      | traces      | n.d.         | 1.46 ± 0.03  | n.d.        |
| 111 | Kaempferol 3- <i>O</i> -Rha (=afzelin)                                             | 0.36 ± 0.00 | 0.06 ± 0.00 | n.d.         | 0.12 ± 0.00  | n.d.        |
| 112 | Herbacetin 7- <i>O</i> -Rha (=rhodionin)                                           | traces      | traces      | n.d.         | 1.77 ± 0.04  | n.d.        |
| 113 | Herbacetin <i>O</i> -dHex (S3)                                                     | n.d.        | n.d.        | n.d.         | traces       | n.d.        |
| 114 | Kaempferol 7- <i>O</i> -Rha                                                        | 0.10 ± 0.00 | traces      | n.d.         | traces       | n.d.        |
| 115 | Hibiscetin di- <i>O</i> -Hex- <i>O</i> -HexA (S38)                                 | n.d.        | n.d.        | traces       | traces       | n.d.        |
| 116 | Gossypetin di- <i>O</i> -Hex- <i>O</i> -HexA (S378)                                | n.d.        | n.d.        | 0.55 ± 0.01  | traces       | n.d.        |
| 117 | Gossypetin <i>O</i> -Ac-di- <i>O</i> -Hex- <i>O</i> -HexA (S378)                   | n.d.        | n.d.        | traces       | n.d.         | traces      |
| 118 | Gossypetin <i>O</i> -Ac-di- <i>O</i> -Hex- <i>O</i> -HexA (S378)                   | n.d.        | n.d.        | traces       | traces       | n.d.        |
| 119 | Herbacetin di- <i>O</i> -Hex- <i>O</i> -HexA (S38)                                 | n.d.        | n.d.        | traces       | traces       | n.d.        |
| 120 | Herbacetin di- <i>O</i> -Hex- <i>O</i> -HexA (S378)                                | traces      | traces      | 10.35 ± 0.21 | n.d.         | traces      |
| 121 | Herbacetin <i>O</i> -Mal-di- <i>O</i> -Hex- <i>O</i> -HexA (S378)                  | traces      | traces      | 2.11 ± 0.04  | traces       | traces      |
| 122 | Herbacetin <i>O</i> -Ac-di- <i>O</i> -Hex- <i>O</i> -HexA (S378)                   | n.d.        | n.d.        | traces       | n.d.         | traces      |
| 123 | Hibiscetin <i>O</i> -Hex- <i>O</i> -HexA (S38)                                     | traces      | traces      | 0.89 ± 0.02  | 0.92 ± 0.02  | 0.07 ± 0.00 |
| 124 | Hibiscetin <i>O</i> -Mal- <i>O</i> -Hex- <i>O</i> -HexA (S38)                      | n.d.        | n.d.        | traces       | traces       | traces      |
| 125 | Hibiscetin <i>O</i> -Ac- <i>O</i> -Hex- <i>O</i> -HexA (S38)                       | n.d.        | n.d.        | traces       | n.d.         | traces      |
| 126 | Gossypetin 3- <i>O</i> -Glc-8- <i>O</i> -GlcA                                      | 0.19 ± 0.00 | 0.08 ± 0.00 | 1.42 ± 0.03  | 2.33 ± 0.05  | 0.37 ± 0.00 |
| 127 | Gossypetin 3- <i>O</i> -(3'- <i>O</i> -Ac)-Glc-8- <i>O</i> -GlcA (=rhodiquadrin B) | traces      | traces      | traces       | traces       | traces      |
| 128 | 5- <i>O</i> -Feruloylquinic acid                                                   | traces      | traces      | traces       | traces       | traces      |
| 129 | Herbacetin 8- <i>O</i> -(2'- <i>O</i> -Glc)-GlcA (=rhodiquadrin C)                 | traces      | traces      | traces       | traces       | traces      |
| 130 | Herbacetin 3- <i>O</i> -Glc-8- <i>O</i> -GlcA                                      | traces      | traces      | 10.52 ± 0.22 | 4.96 ± 0.10  | 1.14 ± 0.02 |
| 131 | Herbacetin <i>O</i> -Ac- <i>O</i> -Hex- <i>O</i> -HexA (S3,8)                      | n.d.        | n.d.        | traces       | n.d.         | n.d.        |
| 132 | Herbacetin 3- <i>O</i> -(3'- <i>O</i> -Ac)-Glc-8- <i>O</i> -GlcA                   | 0.16 ± 0.00 | 0.07 ± 0.00 | 0.38 ± 0.00  | 0.37 ± 0.00  | traces      |
| 133 | Gossypetin di- <i>O</i> -Ac- <i>O</i> -Hex- <i>O</i> -HexA (S3,8)                  | 0.09 ± 0.00 | 0.03 ± 0.00 | traces       | n.d.         | traces      |
| 134 | Gossypetin di- <i>O</i> -Ac- <i>O</i> -Hex- <i>O</i> -HexA (S3,8)                  | traces      | traces      | traces       | traces       | traces      |
| 135 | Herbacetin <i>O</i> -Ac- <i>O</i> -Hex- <i>O</i> -HexA (S3,8)                      | traces      | traces      | traces       | 0.49 ± 0.01  | 0.95 ± 0.02 |
| 136 | Herbacetin <i>O</i> -Ac- <i>O</i> -Hex- <i>O</i> -HexA (S3,8)                      | traces      | traces      | traces       | traces       | traces      |
| 137 | Herbacetin di- <i>O</i> -Ac- <i>O</i> -Hex- <i>O</i> -HexA (S3,8)                  | traces      | traces      | 0.63 ± 0.02  | 0.40 ± 0.01  | traces      |
| 138 | Gossypetin 8- <i>O</i> -GlcA (=hibifolin)                                          | n.d.        | n.d.        | traces       | n.d.         | traces      |
| 139 | Gossypetin <i>O</i> -Mal- <i>O</i> -HexA (S8)                                      | n.d.        | n.d.        | traces       | 0.65 ± 0.02  | n.d.        |
| 140 | Gossypetin <i>O</i> -Mal- <i>O</i> -HexA (S8)                                      | traces      | traces      | traces       | n.d.         | n.d.        |
| 141 | Gossypetin <i>O</i> -Ac- <i>O</i> -HexA (S8)                                       | traces      | traces      | traces       | traces       | n.d.        |
| 142 | Gossypetin <i>O</i> -Ac- <i>O</i> -HexA (S8)                                       | n.d.        | n.d.        | traces       | traces       | n.d.        |

Table S8. Cont.

| No  | Compound                                           | Roots       | Rhizome     | Leaves | Flowers     | Stems       |
|-----|----------------------------------------------------|-------------|-------------|--------|-------------|-------------|
| 143 | Herbacetin 8-O-GlcA (=melocorin)                   | 0.55 ± 0.01 | 0.19 ± 0.00 | traces | 2.55 ± 0.05 | 2.03 ± 0.04 |
| 144 | Herbacetin O-Mal-O-HexA (S8)                       | 0.14 ± 0.00 | 0.05 ± 0.00 | traces | traces      | n.d.        |
| 145 | Herbacetin O-Ac-O-HexA (S8)                        | traces      | traces      | traces | n.d.        | n.d.        |
| 146 | Herbacetin O-Ac-O-HexA (S8)                        | n.d.        | n.d.        | traces | n.d.        | n.d.        |
|     | Total galloyl glucoses                             | 5.45        | 3.08        | 100.63 | 68.19       | 10.98       |
|     | incl. mono-galloyl glucoses                        | 0.61        | 0.30        | 1.05   | 0.48        | 0.60        |
|     | di-galloyl glucoses                                | 2.29        | 1.17        | 10.35  | 1.56        | 3.89        |
|     | tri-galloyl glucoses                               | 0.83        | 0.42        | 1.95   | 0.00        | 1.04        |
|     | tetra-galloyl glucoses                             | 0.00        | 0.00        | 4.77   | 7.99        | 1.42        |
|     | penta-galloyl glucoses                             | 0.00        | 0.00        | 25.60  | 12.21       | 0.94        |
|     | hexa-galloyl glucoses                              | 0.00        | 0.00        | 37.79  | 24.02       | 2.22        |
|     | hepta-galloyl glucoses                             | 0.00        | 0.00        | 17.45  | 19.10       | 0.51        |
|     | octa-galloyl glucoses                              | 0.00        | 0.00        | 0.00   | 1.31        | 0.09        |
|     | Total catechins                                    | 10.58       | 57.40       | 0.00   | 0.00        | 0.12        |
|     | Total procyanidins                                 | 8.77        | 34.81       | 0.00   | 3.02        | 0.23        |
|     | incl. dimers                                       | 3.50        | 15.48       | 0.00   | 0.19        | 0.15        |
|     | trimers                                            | 3.47        | 12.29       | 0.00   | 0.00        | 0.00        |
|     | tetramers                                          | 0.24        | 1.14        | 0.00   | 1.10        | 0.00        |
|     | pentamers                                          | 1.56        | 5.90        | 0.00   | 1.73        | 0.08        |
|     | Hydroquinone glucosides                            | 4.64        | 8.87        | 16.62  | 24.04       | 2.67        |
|     | <i>p</i> -Hydroxyphenethyl alcohol glucosides      | 1.97        | 20.12       | 0.62   | 1.87        | traces      |
|     | Hydroxynitrile glucosides                          | 0.97        | 2.64        | 1.42   | 2.66        | 0.58        |
|     | Rosiridol glucosides                               | traces      | 5.18        | 0.53   | 6.45        | traces      |
|     | Cinnamyl alcohols glucosides                       | 19.89       | 55.76       | 0.58   | 1.26        | 0.39        |
|     | incl. <i>p</i> -hydroxycinnamyl alcohol glucosides | traces      | 6.30        | 0.58   | 1.26        | 0.39        |
|     | cinnamyl alcohol glucosides                        | 19.89       | 47.42       | 0.00   | 0.00        | 0.00        |
|     | <i>p</i> -methoxycinnamyl alcohol glucosides       | traces      | 2.04        | 0.00   | 0.00        | 0.00        |
|     | Total flavonol glucosides                          | 1.69        | 0.50        | 26.85  | 55.55       | 6.30        |
|     | incl. neutral glucoside                            | 0.56        | 0.08        | traces | 42.88       | 1.74        |
|     | acidic glucoside                                   | 1.13        | 0.42        | 26.85  | 12.67       | 4.56        |
|     | incl. herbacetin glucosides                        | 0.95        | 0.33        | 23.99  | 33.74       | 5.51        |
|     | gossypetin glucosides                              | 0.28        | 0.11        | 1.97   | 20.60       | 0.72        |
|     | hibiscetin glucosides                              | 0.00        | 0.00        | 0.89   | 0.92        | 0.07        |
|     | kaempferol glucosides                              | 0.46        | 0.06        | traces | 0.21        | traces      |
|     | quercetin glucosides                               | traces      | traces      | traces | 0.08        | traces      |

<sup>a</sup> Traces—<0.01 mg/g; n.d.—not detected. <sup>a</sup> Abbreviation used: Ac—acetyl; Araf—arabinofuranose; Arap—arabinopyranose; Glc—glucose; GlcA—glucuronic acid; EGC—epigallocatechin unit; EGCG—epigallocatechin gallate unit; Hex—hexose; HexA—hexuronic acid; Mal—malonyl; Pent—pentose; Rha—rhamnose; Xyl—xylose. Substitution type of flavonol glycoside: S3—3-*O*-substituted; S8—8-*O*-substituted; S37—3,7-di-*O*-substituted; S78—7,8-di-*O*-substituted; S38—3,8-di-*O*-substituted; S378—3,7,8-tri-*O*-substituted; S?—unknown type of *O*-substitution. <sup>c</sup> As a sum of compounds 34 and 35. <sup>d</sup> As a sum of compounds 37 and 38.



**Table S9.** Content of selected compounds in three *R. rosea* extracts, mg/g dry extract weight  $\pm$  S.D.

| No    | Compound                                                       | Rhizome extract  | Leaves extract    | Flowers extract  |
|-------|----------------------------------------------------------------|------------------|-------------------|------------------|
| 7     | 1,6-Di- <i>O</i> -galloyl glucose                              | traces           | 48.21 $\pm$ 0.98  | traces           |
| 11    | Procyanidin dimer (EGC-EGCG)                                   | 44.68 $\pm$ 0.87 | n.d.              | n.d.             |
| 16    | Procyanidin trimer (EGC-EGC-EGCG)                              | 32.75 $\pm$ 0.64 | n.d.              | n.d.             |
| 22    | Epicatechin                                                    | 57.14 $\pm$ 1.16 | n.d.              | n.d.             |
| 23    | Epigallocatechin gallate                                       | 27.11 $\pm$ 0.55 | n.d.              | n.d.             |
| 24    | Gallocatechin gallate                                          | 37.08 $\pm$ 0.73 | n.d.              | n.d.             |
| 30    | Epicatechin gallate                                            | 14.93 $\pm$ 0.27 | n.d.              | n.d.             |
| 32    | Penta- <i>O</i> -galloyl glucose                               | n.d.             | 35.73 $\pm$ 0.72  | 22.82 $\pm$ 0.46 |
| 33    | 1,2,3,4,6-Penta- <i>O</i> -galloyl glucose                     | n.d.             | 92.26 $\pm$ 1.87  | 24.93 $\pm$ 0.48 |
| 34+35 | Hexa- <i>O</i> -galloyl glucoses                               | n.d.             | 188.92 $\pm$ 3.79 | 95.80 $\pm$ 1.97 |
| 37+38 | Hepta- <i>O</i> -galloyl glucoses                              | n.d.             | 85.14 $\pm$ 1.73  | 75.42 $\pm$ 1.42 |
| 46    | Hydroquinone <i>O</i> -Glc (=arbutin)                          | 18.67 $\pm$ 0.35 | 53.11 $\pm$ 1.03  | 51.82 $\pm$ 1.04 |
| 48    | Tyrosol <i>O</i> -Glc (=salidroside)                           | 46.94 $\pm$ 0.92 | traces            | traces           |
| 70    | Cinnamyl alcohol <i>O</i> -(6'- <i>O</i> -Araf)-Glc (=rosarin) | 42.79 $\pm$ 0.86 | n.d.              | n.d.             |
| 71    | Cinnamyl alcohol <i>O</i> -(6'- <i>O</i> -Arap)-Glc (=rosavin) | 69.54 $\pm$ 1.38 | n.d.              | n.d.             |
| 73    | Cinnamyl alcohol <i>O</i> -Glc (=rosin)                        | 24.27 $\pm$ 0.47 | n.d.              | n.d.             |
| 96    | Gossypetin 7- <i>O</i> -Rha-8- <i>O</i> -Glc (=rhodiogidin)    | n.d.             | traces            | 71.42 $\pm$ 1.47 |
| 99    | Herbacetin 7- <i>O</i> -Rha-8- <i>O</i> -Glc (=rhodionidin)    | traces           | traces            | 81.73 $\pm$ 1.62 |
| 120   | Herbacetin di- <i>O</i> -Hex- <i>O</i> -HexA (S378)            | traces           | 50.28 $\pm$ 1.02  | n.d.             |
| 130   | Herbacetin 3- <i>O</i> -Glc-8- <i>O</i> -GlcA                  | traces           | 53.67 $\pm$ 1.09  | 19.74 $\pm$ 0.37 |
|       | Total galloyl glucoses                                         | traces           | 450.26            | 218.97           |
|       | Total procyanidins                                             | 77.43            | n.d.              | n.d.             |
|       | Total catechins                                                | 136.26           | n.d.              | n.d.             |
|       | Total hydroquinone glucosides                                  | 18.67            | 53.11             | 51.82            |
|       | Total <i>p</i> -hydroxyphenethyl alcohol glucosides            | 46.44            | traces            | traces           |
|       | Total cinnamyl alcohol glucosides                              | 136.60           | n.d.              | n.d.             |
|       | Total flavonol glucosides                                      | traces           | 103.95            | 172.89           |

n.d.—not detected.

**Table S10.** Content of selected compounds of *R. rosea* rhizome extract (whole probe) before and after *in vitro* treatment by the simulated gastric and intestinal media, mg/probe  $\pm$  S.D.

| No    | Compound                                                       | Non-treated      | After gastric phase | After intestinal phase |
|-------|----------------------------------------------------------------|------------------|---------------------|------------------------|
| 7     | 1,6-Di- <i>O</i> -galloyl glucose                              | traces           | n.d.                | n.d.                   |
| 11    | Procyanidin dimer (EGC-EGCG)                                   | 22.15 $\pm$ 0.42 | 18.63 $\pm$ 0.38    | 1.18 $\pm$ 0.02        |
| 16    | Procyanidin trimer (EGC-EGC-EGCG)                              | 16.30 $\pm$ 0.31 | 8.63 $\pm$ 0.15     | 0.94 $\pm$ 0.02        |
| 22    | Epicatechin                                                    | 27.94 $\pm$ 0.54 | 25.63 $\pm$ 0.52    | 1.22 $\pm$ 0.02        |
| 23    | Epigallocatechin gallate                                       | 13.42 $\pm$ 0.25 | 5.42 $\pm$ 0.11     | 0.18 $\pm$ 0.00        |
| 24    | Gallocatechin gallate                                          | 18.97 $\pm$ 0.38 | 4.73 $\pm$ 0.08     | 0.23 $\pm$ 0.00        |
| 30    | Epicatechin gallate                                            | 7.45 $\pm$ 0.14  | 5.14 $\pm$ 0.12     | 0.58 $\pm$ 0.01        |
| 32    | Penta- <i>O</i> -galloyl glucose                               | n.d.             | n.d.                | n.d.                   |
| 33    | 1,2,3,4,6-Penta- <i>O</i> -galloyl glucose                     | n.d.             | n.d.                | n.d.                   |
| 34+35 | Hexa- <i>O</i> -galloyl glucoses                               | n.d.             | n.d.                | n.d.                   |
| 37+38 | Hepta- <i>O</i> -galloyl glucoses                              | n.d.             | n.d.                | n.d.                   |
| 46    | Hydroquinone <i>O</i> -Glc (=arbutin)                          | 9.32 $\pm$ 0.17  | 8.64 $\pm$ 0.17     | 7.11 $\pm$ 0.15        |
| 48    | Tyrosol <i>O</i> -Glc (=salidroside)                           | 23.48 $\pm$ 0.45 | 22.76 $\pm$ 0.47    | 20.54 $\pm$ 0.41       |
| 70    | Cinnamyl alcohol <i>O</i> -(6'- <i>O</i> -Araf)-Glc (=rosarin) | 21.18 $\pm$ 0.40 | 20.98 $\pm$ 0.42    | 25.35 $\pm$ 0.51       |
| 71    | Cinnamyl alcohol <i>O</i> -(6'- <i>O</i> -Arap)-Glc (=rosavin) | 34.75 $\pm$ 0.67 | 33.86 $\pm$ 0.69    | 26.18 $\pm$ 0.52       |
| 73    | Cinnamyl alcohol <i>O</i> -Glc (=rosin)                        | 12.09 $\pm$ 0.22 | 12.93 $\pm$ 0.25    | 15.71 $\pm$ 0.31       |
| 96    | Gossypetin 7- <i>O</i> -Rha-8- <i>O</i> -Glc (=rhodiogidin)    | n.d.             | n.d.                | n.d.                   |
| 99    | Herbacetin 7- <i>O</i> -Rha-8- <i>O</i> -Glc (=rhodionidin)    | traces           | n.d.                | n.d.                   |
| 120   | Herbacetin di- <i>O</i> -Hex- <i>O</i> -HexA (S378)            | traces           | n.d.                | n.d.                   |
| 130   | Herbacetin 3- <i>O</i> -Glc-8- <i>O</i> -GlcA                  | traces           | n.d.                | n.d.                   |
|       | Total galloyl glucoses                                         | traces           | n.d.                | n.d.                   |
|       | Total procyanidins                                             | 38.45            | 27.26               | 2.12                   |
|       | Total catechins                                                | 67.78            | 40.92               | 2.21                   |
|       | Total hydroquinone glucosides                                  | 9.32             | 8.64                | 7.11                   |
|       | Total <i>p</i> -hydroxyphenethyl alcohol glucosides            | 23.48            | 22.76               | 20.54                  |
|       | Total cinnamyl alcohol glucosides                              | 68.02            | 67.77               | 67.24                  |
|       | Total flavonol glucosides                                      | traces           | n.d.                | n.d.                   |

n.d. — not detected.

**Table S11.** Content of selected compounds of *R. rosea* leaves extract (whole probe) before and after *in vitro* treatment by the simulated gastric and intestinal media, mg/probe  $\pm$  S.D.

| No    | Compound                                                       | Non-treated      | After gastric phase | After intestinal phase |
|-------|----------------------------------------------------------------|------------------|---------------------|------------------------|
| 7     | 1,6-Di- <i>O</i> -galloyl glucose                              | 24.02 $\pm$ 0.49 | 22.83 $\pm$ 0.42    | 15.79 $\pm$ 0.31       |
| 11    | Procyanidin dimer (EGC-EGCG)                                   | n.d.             | n.d.                | n.d.                   |
| 16    | Procyanidin trimer (EGC-EGC-EGCG)                              | n.d.             | n.d.                | n.d.                   |
| 22    | Epicatechin                                                    | n.d.             | n.d.                | n.d.                   |
| 23    | Epigallocatechin gallate                                       | n.d.             | n.d.                | n.d.                   |
| 24    | Gallocatechin gallate                                          | n.d.             | n.d.                | n.d.                   |
| 30    | Epicatechin gallate                                            | n.d.             | n.d.                | n.d.                   |
| 32    | Penta- <i>O</i> -galloyl glucose                               | 17.53 $\pm$ 0.36 | 5.37 $\pm$ 0.11     | 0.92 $\pm$ 0.02        |
| 33    | 1,2,3,4,6-Penta- <i>O</i> -galloyl glucose                     | 46.18 $\pm$ 0.90 | 12.78 $\pm$ 0.23    | 1.40 $\pm$ 0.03        |
| 34+35 | Hexa- <i>O</i> -galloyl glucoses                               | 94.27 $\pm$ 1.91 | 25.92 $\pm$ 0.51    | 3.18 $\pm$ 0.06        |
| 37+38 | Hepta- <i>O</i> -galloyl glucoses                              | 42.49 $\pm$ 0.86 | 11.37 $\pm$ 0.19    | 0.72 $\pm$ 0.02        |
| 46    | Hydroquinone <i>O</i> -Glc (=arbutin)                          | 26.59 $\pm$ 0.54 | 24.19 $\pm$ 0.47    | 19.14 $\pm$ 0.37       |
| 48    | Tyrosol <i>O</i> -Glc (=salidroside)                           | traces           | n.d.                | n.d.                   |
| 70    | Cinnamyl alcohol <i>O</i> -(6'- <i>O</i> -Araf)-Glc (=rosarin) | n.d.             | n.d.                | n.d.                   |
| 71    | Cinnamyl alcohol <i>O</i> -(6'- <i>O</i> -Arap)-Glc (=rosavin) | n.d.             | n.d.                | n.d.                   |
| 73    | Cinnamyl alcohol <i>O</i> -Glc (=rosin)                        | n.d.             | n.d.                | n.d.                   |
| 96    | Gossypetin 7- <i>O</i> -Rha-8- <i>O</i> -Glc (=rhodiogidin)    | traces           | n.d.                | n.d.                   |
| 99    | Herbacetin 7- <i>O</i> -Rha-8- <i>O</i> -Glc (=rhodionidin)    | traces           | n.d.                | n.d.                   |
| 120   | Herbacetin di- <i>O</i> -Hex- <i>O</i> -HexA (S378)            | 25.09 $\pm$ 0.48 | 24.98 $\pm$ 0.48    | 24.82 $\pm$ 0.49       |
| 130   | Herbacetin 3- <i>O</i> -Glc-8- <i>O</i> -GlcA                  | 26.82 $\pm$ 0.53 | 26.70 $\pm$ 0.51    | 26.61 $\pm$ 0.52       |
|       | Total galloyl glucoses                                         | 224.49           | 78.27               | 22.01                  |
|       | Total procyanidins                                             | n.d.             | n.d.                | n.d.                   |
|       | Total catechins                                                | n.d.             | n.d.                | n.d.                   |
|       | Total hydroquinone glucosides                                  | 26.59            | 24.19               | 19.14                  |
|       | Total <i>p</i> -hydroxyphenethyl alcohol glucosides            | traces           | n.d.                | n.d.                   |
|       | Total cinnamyl alcohol glucosides                              | n.d.             | n.d.                | n.d.                   |
|       | Total flavonol glucosides                                      | 51.91            | 51.68               | 51.43                  |

n.d. — not detected.

**Table S12.** Content of selected compounds of *R. rosea* flowers extract (whole probe) before and after *in vitro* treatment by the simulated gastric and intestinal media, mg/probe  $\pm$  S.D.

| No    | Compound                                                       | Non-treated      | After gastric phase | After intestinal phase |
|-------|----------------------------------------------------------------|------------------|---------------------|------------------------|
| 7     | 1,6-Di- <i>O</i> -galloyl glucose                              | traces           | n.d.                | n.d.                   |
| 11    | Procyanidin dimer (EGC-EGCG)                                   | n.d.             | n.d.                | n.d.                   |
| 16    | Procyanidin trimer (EGC-EGC-EGCG)                              | n.d.             | n.d.                | n.d.                   |
| 22    | Epicatechin                                                    | n.d.             | n.d.                | n.d.                   |
| 23    | Epigallocatechin gallate                                       | n.d.             | n.d.                | n.d.                   |
| 24    | Gallocatechin gallate                                          | n.d.             | n.d.                | n.d.                   |
| 30    | Epicatechin gallate                                            | n.d.             | n.d.                | n.d.                   |
| 32    | Penta- <i>O</i> -galloyl glucose                               | 11.40 $\pm$ 0.22 | 3.06 $\pm$ 0.06     | 0.83 $\pm$ 0.02        |
| 33    | 1,2,3,4,6-Penta- <i>O</i> -galloyl glucose                     | 12.37 $\pm$ 0.25 | 3.29 $\pm$ 0.06     | 0.86 $\pm$ 0.02        |
| 34+35 | Hexa- <i>O</i> -galloyl glucoses                               | 47.63 $\pm$ 0.94 | 12.53 $\pm$ 0.25    | 2.63 $\pm$ 0.05        |
| 37+38 | Hepta- <i>O</i> -galloyl glucoses                              | 37.75 $\pm$ 0.76 | 9.43 $\pm$ 0.19     | 2.04 $\pm$ 0.04        |
| 46    | Hydroquinone <i>O</i> -Glc (=arbutin)                          | 25.73 $\pm$ 0.49 | 24.18 $\pm$ 0.50    | 19.55 $\pm$ 0.39       |
| 48    | Tyrosol <i>O</i> -Glc (=salidroside)                           | traces           | n.d.                | n.d.                   |
| 70    | Cinnamyl alcohol <i>O</i> -(6'- <i>O</i> -Araf)-Glc (=rosarin) | n.d.             | n.d.                | n.d.                   |
| 71    | Cinnamyl alcohol <i>O</i> -(6'- <i>O</i> -Arap)-Glc (=rosavin) | n.d.             | n.d.                | n.d.                   |
| 73    | Cinnamyl alcohol <i>O</i> -Glc (=rosin)                        | n.d.             | n.d.                | n.d.                   |
| 96    | Gossypetin 7- <i>O</i> -Rha-8- <i>O</i> -Glc (=rhodiogidin)    | 35.67 $\pm$ 0.67 | 35.04 $\pm$ 0.72    | 34.81 $\pm$ 0.69       |
| 99    | Herbacetin 7- <i>O</i> -Rha-8- <i>O</i> -Glc (=rhodionidin)    | 40.59 $\pm$ 0.82 | 40.11 $\pm$ 0.81    | 39.93 $\pm$ 0.77       |
| 120   | Herbacetin di- <i>O</i> -Hex- <i>O</i> -HexA (S378)            | n.d.             | n.d.                | n.d.                   |
| 130   | Herbacetin 3- <i>O</i> -Glc-8- <i>O</i> -GlcA                  | 9.82 $\pm$ 0.19  | 9.73 $\pm$ 0.19     | 9.58 $\pm$ 0.19        |
|       | Total galloyl glucoses                                         | 109.15           | 28.31               | 6.36                   |
|       | Total procyanidins                                             | n.d.             | n.d.                | n.d.                   |
|       | Total catechins                                                | n.d.             | n.d.                | n.d.                   |
|       | Total hydroquinone glucosides                                  | 25.73            | 24.18               | 19.55                  |
|       | Total <i>p</i> -hydroxyphenethyl alcohol glucosides            | traces           | n.d.                | n.d.                   |
|       | Total cinnamyl alcohol glucosides                              | n.d.             | n.d.                | n.d.                   |
|       | Total flavonol glucosides                                      | 86.08            | 84.88               | 84.32                  |

n.d. — not detected.
